# Supplementary material
Source: PubMed Central journal article supplement (PMC7710473)
Supplement: mmc1.pdf [file mmc1.pdf]

## ONLINE SUPPLEMENTARY

### Prevalence of mental health problems during the COVID-19 pandemic: A systematic review and meta-analysis

#### Index

|     |                                                                                                                                         |         |
|-----|-----------------------------------------------------------------------------------------------------------------------------------------|---------|
| 1.  | Supplementary Table S1 Search strategy                                                                                                  | Page 2  |
| 2.  | Supplementary Table S2 Characteristics of included studies                                                                              | Page 3  |
| 3.  | Supplementary Figure S1 Overall risk of bias of included studies (Strengthening the Reporting of Observational Studies in Epidemiology) | Page 9  |
| 4.  | Supplementary Figure S2 Quality assessment of included studies (Strengthening the Reporting of Observational Studies in Epidemiology)   | Page 10 |
| 5.  | Supplementary Figure S3 Forest plot of pooled prevalence of depression                                                                  | Page 11 |
| 6.  | Supplementary Figure S4 Forest plot of pooled prevalence of anxiety                                                                     | Page 12 |
| 7.  | Supplementary Figure S5 Forest plot of pooled prevalence of distress                                                                    | Page 13 |
| 8.  | Supplementary Figure S6 Forest plot of pooled prevalence of insomnia                                                                    | Page 14 |
| 9.  | Supplementary Figure S7 Subgroup comparison of depression between front- and second-line medical personnel                              | Page 15 |
| 10. | Supplementary Figure S8 Subgroup comparison of anxiety between front- and second-line medical personnel                                 | Page 16 |
| 11. | Supplementary Table S3 Meta-regression of factors affecting heterogeneity for depression                                                | Page 17 |
| 12. | Supplementary Table S4 Meta-regression of factors affecting heterogeneity for anxiety                                                   | Page 18 |
| 13. | Supplementary Table S5 Meta-regression of factors affecting heterogeneity for distress                                                  | Page 19 |
| 14. | Supplementary Table S6 Meta-regression of factors affecting heterogeneity for insomnia                                                  | Page 19 |
| 15. | Supplementary Table S7 Sensitivity analysis of random effects pooled prevalence of depression and anxiety                               | Page 20 |
| 16. | Supplementary Table S8 Sensitivity analysis of random effects pooled prevalence of distress and insomnia                                | Page 21 |
| 17. | Supplementary Figure S9 Funnel plots and Egger regression of depression                                                                 | Page 22 |
| 18. | Supplementary Figure S10 Funnel plots and Egger regression of anxiety                                                                   | Page 22 |
| 19. | Supplementary Figure S11 Funnel plots and Egger regression of distress                                                                  | Page 23 |
| 20. | Supplementary Figure S12 Funnel plots and Egger regression of insomnia                                                                  | Page 23 |
| 21. | References                                                                                                                              | Page 24 |

## Supplementary Table S1 Search strategy

|                                                                                                                                                                                                                                                                                                                                                                                                                                                                                                                                                                                                                                                                                                                                                        |
|--------------------------------------------------------------------------------------------------------------------------------------------------------------------------------------------------------------------------------------------------------------------------------------------------------------------------------------------------------------------------------------------------------------------------------------------------------------------------------------------------------------------------------------------------------------------------------------------------------------------------------------------------------------------------------------------------------------------------------------------------------|
| <b>For PubMed</b>                                                                                                                                                                                                                                                                                                                                                                                                                                                                                                                                                                                                                                                                                                                                      |
| ((COVID-19 [Title/Abstract] OR “COVID 19”[Title/Abstract] OR COVID19[Title/Abstract] OR “new coronavirus”[Title/Abstract] OR “novel coronavirus”[Title/Abstract] OR “Severe Acute Respiratory Syndrome Coronavirus 2”[Title/Abstract] OR “SARS CoV-2”[Title/Abstract] OR “2019 nCoV”[Title/Abstract] OR 2019nCoV[Title/Abstract] OR “2019 novel coronavirus”[Title/Abstract] OR SARS-CoV[Title/Abstract] OR 2019-nCoV[Title/Abstract] OR SARS-CoV-2[Title/Abstract])) AND (mental[Title/Abstract] OR psychological[Title/Abstract] OR depression[Title/Abstract] OR anxiety[Title/Abstract] OR emotional responses[Title/Abstract] OR psychological distress[Title/Abstract] OR vicarious traumatization[Title/Abstract] OR wellbeing[Title/Abstract]) |
| <b>For Embase</b>                                                                                                                                                                                                                                                                                                                                                                                                                                                                                                                                                                                                                                                                                                                                      |
| (COVID-19:ab,ti OR “COVID 19”:ab,ti OR COVID19:ab,ti OR “new coronavirus”:ab,ti OR “novel coronavirus”:ab,ti OR “Severe Acute Respiratory Syndrome Coronavirus 2”:ab,ti OR “SARS CoV-2”:ab,ti OR “2019 nCoV”:ab,ti OR 2019nCoV:ab,ti OR “2019 novel coronavirus”:ab,ti OR SARS-CoV:ab,ti OR 2019-nCoV:ab,ti OR SARS-CoV-2:ab,ti) AND (mental:ab,ti OR psychological:ab,ti OR depression:ab,ti OR anxiety:ab,ti OR emotional responses:ab,ti OR psychological distress:ab,ti OR vicarious traumatization:ab,ti OR wellbeing:ab,ti)                                                                                                                                                                                                                      |
| <b>For Web of Science</b>                                                                                                                                                                                                                                                                                                                                                                                                                                                                                                                                                                                                                                                                                                                              |
| TS= (COVID-19 OR “COVID 19” OR COVID19 OR “new coronavirus” OR “novel coronavirus” OR “Severe Acute Respiratory Syndrome Coronavirus 2” OR “SARS CoV-2” OR “2019 nCoV” OR 2019nCoV OR “2019 novel coronavirus” OR SARS-CoV OR 2019-nCoV OR SARS-CoV-2) AND TS= (mental OR psychological OR depression OR anxiety OR emotional responses OR psychological distress OR vicarious traumatization OR wellbeing)                                                                                                                                                                                                                                                                                                                                            |
| <b>For Ovid</b>                                                                                                                                                                                                                                                                                                                                                                                                                                                                                                                                                                                                                                                                                                                                        |
| ((COVID-19 or "COVID 19" or COVID19 or "new coronavirus" or "novel coronavirus" or "Severe Acute Respiratory Syndrome Coronavirus 2" or "SARS CoV-2" or "2019 nCoV" or 2019nCoV or "2019 novel coronavirus" or SARS-CoV or 2019-nCoV or SARS-CoV-2) and (mental or psychological or depression or anxiety or emotional responses or psychological distress or vicarious traumatization or wellbeing)).tx.                                                                                                                                                                                                                                                                                                                                              |
| <b>For SSRN, bioRxiv, and medRxiv the following items were used in combination search</b>                                                                                                                                                                                                                                                                                                                                                                                                                                                                                                                                                                                                                                                              |
| COVID-19, novel coronavirus, Severe Acute Respiratory Syndrome Coronavirus 2, 2019-nCoV, SARS-CoV-2<br>mental, psychological, depression, anxiety, emotional responses, psychological distress, vicarious traumatization, wellbeing                                                                                                                                                                                                                                                                                                                                                                                                                                                                                                                    |
| <b>For CNKI</b>                                                                                                                                                                                                                                                                                                                                                                                                                                                                                                                                                                                                                                                                                                                                        |
| SU='新冠肺炎'+2019 冠状病毒病+新型冠状病毒+新冠疫情+COVID-19' AND SU='精神'+心理+'焦虑'+抑郁+'睡眠'+失眠+'紧张'+压力+'情绪'                                                                                                                                                                                                                                                                                                                                                                                                                                                                                                                                                                                                                                                                 |
| <b>For Wangfang Data</b>                                                                                                                                                                                                                                                                                                                                                                                                                                                                                                                                                                                                                                                                                                                               |
| 主题:(“新冠肺炎” + “新冠病毒” + “2019 冠状病毒病” + “新型冠状病毒” + “COVID-19” + “新冠疫情” ) AND 主题:(“精神” + “心理” + “焦虑” + “抑郁” + “睡眠” + “失眠” + “紧张” + “压力” + “情绪” )                                                                                                                                                                                                                                                                                                                                                                                                                                                                                                                                                                                                           |

**Supplementary Table S2 Characteristics of included studies**

| Authors               | Countries | Recruitment period |           | Participants          | Sample size | Female % | Age       | Bachelor and above % | Outcomes   | Measurement tools       | No. of positive symptom |
|-----------------------|-----------|--------------------|-----------|-----------------------|-------------|----------|-----------|----------------------|------------|-------------------------|-------------------------|
|                       |           | Start date         | End date  |                       |             |          |           |                      |            |                         |                         |
| Cai and Yuan, 2020    | China     | NA                 | NA        | Physicians and nurses | 48          | 77.1     | 32.5±2.0  | 100.0                | Anxiety    | SCL-90                  | 42                      |
|                       |           |                    |           |                       |             |          |           |                      | Depression | SCL-90                  | 2                       |
| Cai et al., 2020      | China     | 2020/1/31          | 2020/2/4  | General population    | 22,302      | 66.8     | 22.4±5.3  | 78.1                 | Depression | PHQ-9                   | 7,226                   |
| Cao et al., 2020a     | China     | 2020/2/1           | 2020/2/28 | COVID-19 patients     | 148         | 52.7     | 50.2±15.6 | 56.8                 | Anxiety    | SAS                     | 32                      |
|                       |           |                    |           |                       |             |          |           |                      | Depression | SDS                     | 74                      |
| Cao et al., 2020b     | China     | NA                 | NA        | Physicians and nurses | 37          | 78.4     | 32.8±9.6  |                      | Depression | PHQ-9                   | 7                       |
| Cao et al., 2020c     | China     | NA                 | NA        | Students              | 7,143       | 69.6     |           |                      | Anxiety    | GAD-7                   | 1,776                   |
| Chang et al., 2020    | China     | 2020/1/31          | 2020/2/3  | Students              | 3,881       | 63.1     | 20(19-22) | 100.0                | Anxiety    | GAD-7                   | 1,032                   |
|                       |           |                    |           |                       |             |          |           |                      | Depression | PHQ-9                   | 821                     |
| Chen et al., 2020b    | China     | NA                 | NA        | Physicians and nurses | 206         | 69.4     | 34.0±8.9  |                      | Anxiety    | SAS                     | 23                      |
| Chen et al., 2020c    | China     | NA                 | NA        | Physicians and nurses | 105         | 90.5     | 32.6±6.5  |                      | Anxiety    | SAS                     | 19                      |
|                       |           |                    |           |                       |             |          |           |                      | Depression | SDS                     | 31                      |
| Cheng et al., 2020a   | China     | 2020/2/1           | 2020/2/2  | Quarantined persons   | 56          | 64.3     | 32.5±3.8  | 75.0                 | Anxiety    | Self-made questionnaire | 36                      |
|                       |           |                    |           |                       |             |          |           |                      | Depression |                         | 13                      |
|                       |           |                    |           | COVID-19 patients     | 59          | 59.3     | 30.8±5.1  | 62.7                 | Anxiety    |                         | 28                      |
|                       |           |                    |           |                       |             |          |           |                      | Depression |                         | 16                      |
| Cheng et al., 2020b   | China     | 2020/2/1           | 2020/2/16 | COVID-19 patients     | 76          | 59.2     | 35.9±10.6 | 51.3                 | Anxiety    | SAS                     | 50                      |
| Chung and Yeung, 2020 | China     | 2020/2/14          | 2020/2/23 | Physicians and nurses | 69          |          |           |                      | Depression | PHQ-9                   | 34                      |
| Dai et al., 2020      | China     | 2020/2/3           | 2020/2/11 | Physicians and nurses | 4,357       | 76.5     | 35±8.6    |                      | Distress   | GHQ-12                  | 1,704                   |
|                       |           |                    |           | Non-medical staff     | 595         |          |           |                      | Distress   | GHQ-12                  | 182                     |
| Dong et al., 2020     | China     | 2020/2/6           | 2020/2/6  | Quarantined persons   | 40          | 57.5     | 35.3±4.3  | 97.5                 | Anxiety    | GAD-7                   | 23                      |
|                       |           |                    |           |                       |             |          |           |                      | Depression | PHQ-9                   | 16                      |
|                       |           |                    |           | General population    | 38          | 57.9     | 33.4±4.7  | 89.5                 | Anxiety    | GAD-7                   | 12                      |
|                       |           |                    |           |                       |             |          |           |                      | Depression | PHQ-9                   | 7                       |
| Du et al., 2020       | China     | 2020/2/13          | 2020/2/17 | Non-medical staff     | 32          |          | 36±8.1    |                      | Anxiety    | BAI                     | 4                       |
|                       |           |                    |           |                       |             |          |           |                      | Depression | BDI- II                 | 1                       |
| Duan et al., 2020     | China     | 2020/2/14          | 2020/2/16 | Physicians and nurses | 530         |          |           |                      | Anxiety    | GAD-7                   | 140                     |
|                       |           |                    |           |                       |             |          |           |                      | Depression | PHQ-9                   | 175                     |

|                      |       |           |           |                       |        |      |           |       |            |            |       |            |       |     |
|----------------------|-------|-----------|-----------|-----------------------|--------|------|-----------|-------|------------|------------|-------|------------|-------|-----|
|                      |       |           |           | Non-medical staff     | 112    |      |           |       | Anxiety    | GAD-7      | 49    |            |       |     |
|                      |       |           |           |                       |        |      |           |       | Depression | PHQ-9      | 59    |            |       |     |
| Gao et al., 2020     | China | 2020/1/31 | 2020/2/2  | General population    | 4,827  | 67.7 | 31.7±4.7  | 78.5  | Anxiety    | GAD-7      | 1,091 |            |       |     |
|                      |       |           |           |                       |        |      |           |       |            | Depression | WHO-5 | 2,331      |       |     |
|                      |       |           |           | Physicians and nurses | 251    |      |           |       |            | Anxiety    | GAD-7 | 53         |       |     |
|                      |       |           |           |                       |        |      |           |       |            | Depression | WHO-5 | 124        |       |     |
| Guo et al., 2020     | China | 2020/2/18 | 2020/2/20 | Physicians and nurses | 11,118 | 74.8 | 35.0±4.6  | 96.4  | Anxiety    | SAS        | 1,940 |            |       |     |
|                      |       |           |           |                       |        |      |           |       | Depression | SDS        | 3,497 |            |       |     |
| He et al., 2020      | China | 2020/1/24 | 2020/3/2  | Physicians and nurses | 362    | 55.2 |           |       | Insomnia   | PSQI       | 216   |            |       |     |
| Hu et al., 2020      | China | 2020/2/19 | 2020/2/26 | General population    | 992    | 57.3 | 36(28-42) | 74.6  | Anxiety    | SAS        | 95    |            |       |     |
| Hua et al., 2020     | China | 2020/2/1  | 2020/2/4  | General population    | 1,588  | 66.9 | 33.7±12.0 | 69.6  | Distress   | K6         | 362   |            |       |     |
|                      |       |           |           | Suspected infection   | 256    | 62.1 | 21.2±5.5  | 74.6  | Distress   | K6         | 255   |            |       |     |
| Huang and Ke, 2020   | China | NA        | NA        | Non-medical staff     | 50     | 64.0 | 38.3±11.9 |       | Anxiety    | SAS        | 11    |            |       |     |
| Huang and Zhao, 2020 | China | 2020/2/3  | 2020/2/17 | General population    | 7,236  | 54.6 | 35.3±5.6  |       | Anxiety    | GAD-7      | 2,540 |            |       |     |
|                      |       |           |           |                       |        |      |           |       | Depression | CES-D      | 1,454 |            |       |     |
|                      |       |           |           |                       |        |      |           |       | Insomnia   | PSQI       | 1,317 |            |       |     |
|                      |       |           |           | Physicians and nurses | 2,250  |      |           |       |            |            |       | Anxiety    | GAD-7 | 802 |
|                      |       |           |           |                       |        |      |           |       |            |            |       | Depression | CES-D | 446 |
|                      |       |           |           |                       |        |      |           |       |            |            |       | Insomnia   | PSQI  | 531 |
| Ji et al., 2020      | China | 2020/2/14 | 2020/2/19 | General population    | 1,031  | 84.8 | 20.0±1.6  | 100.0 | Anxiety    | SAS        | 140   |            |       |     |
|                      |       |           |           |                       |        |      |           |       | Depression | SDS        | 247   |            |       |     |
|                      |       |           |           |                       |        |      |           |       | Insomnia   | PSQI       | 79    |            |       |     |
| Kazmi, 2020          | India | 2020/4/1  | 2020/4/1  | General population    | 1,000  | 62.0 | 25.4±2.7  |       | Anxiety    | DASS-21    | 430   |            |       |     |
|                      |       |           |           |                       |        |      |           |       | Depression | DASS-21    | 389   |            |       |     |
|                      |       |           |           |                       |        |      |           |       | Distress   | DASS-21    | 357   |            |       |     |
| Kong et al., 2020    | China | 2020/2/23 | 2020/3/13 | COVID-19 patients     | 144    | 51.4 | 50.0±13.7 | 37.5  | Anxiety    | HAMA       | 50    |            |       |     |
|                      |       |           |           |                       |        |      |           |       | Depression | HAMD       | 41    |            |       |     |
| Lai et al., 2020     | China | 2020/1/29 | 2020/2/3  | Physicians and nurses | 1,257  | 76.7 | 31.9±4.3  |       | Distress   | IES        | 899   |            |       |     |
|                      |       |           |           |                       |        |      |           |       | Anxiety    | GAD-7      | 560   |            |       |     |
|                      |       |           |           |                       |        |      |           |       | Depression | PHQ-9      | 634   |            |       |     |
|                      |       |           |           |                       |        |      |           |       | Insomnia   | ISI        | 427   |            |       |     |
| Li et al., 2020a     | China | 2020/2/6  | 2020/2/8  | Students              | 396    | 49.7 | 12.8±2.6  |       | Anxiety    | SCARED     | 87    |            |       |     |

|                               |       |           |           |                       |        |      |          |       |            |         |       |
|-------------------------------|-------|-----------|-----------|-----------------------|--------|------|----------|-------|------------|---------|-------|
| Li et al., 2020c              | China | 2020/1/31 | 2020/2/22 | Quarantined persons   | 76     | 46.1 |          |       | Anxiety    | HAMA    | 36    |
|                               |       |           |           |                       |        |      |          |       | Depression | HAMD    | 23    |
| Li et al., 2020d              | China | 2020/1/30 | 2020/2/1  | General population    | 977    | 78.6 | 33.2±8.6 | 54.8  | Anxiety    | GAD-7   | 188   |
|                               |       |           |           |                       |        |      |          |       | Depression | PHQ-9   | 212   |
| Liu et al., 2020a             | China | 2020/2/10 | 2020/2/20 | Physicians and nurses | 512    | 84.6 | 33.8±6.6 | 94.9  | Anxiety    | SAS     | 64    |
| Liu et al., 2020b             | China | 2020/1/30 | 2020/2/13 | General population    | 13,904 |      |          |       | Anxiety    | GAD-7   | 6,196 |
|                               |       |           |           |                       | 14,036 |      |          |       | Depression | PHQ-9   | 7,503 |
|                               |       |           |           | Students              | 1,646  |      |          |       | Anxiety    | GAD-7   | 739   |
|                               |       |           |           |                       | 1,660  |      |          |       | Depression | PHQ-9   | 973   |
|                               |       |           |           | Physicians and nurses | 1,814  |      |          |       | Anxiety    | GAD-7   | 787   |
|                               |       |           |           |                       | 1,827  |      |          |       | Depression | PHQ-9   | 940   |
| Liu et al., 2020d             | China | 2020/2/1  | 2020/2/5  | Students              | 509    | 65.4 | 21.3     |       | Anxiety    | SAS     | 45    |
|                               |       |           |           |                       |        |      |          |       | Depression | PHQ-9   | 70    |
| Liu et al., 2020e             | China | 2020/2/17 | 2020/2/24 | Physicians and nurses | 4,679  | 82.3 | 35.9±9.0 |       | Distress   | SRQ-20  | 744   |
|                               |       |           |           |                       |        |      |          |       | Anxiety    | SAS     | 749   |
|                               |       |           |           |                       |        |      |          |       | Depression | SDS     | 1,619 |
| Lu et al., 2020b              | China | 2020/2/25 | 2020/2/26 | Physicians and nurses | 2,042  | 77.9 | 34.0±5.1 | 70.8  | Anxiety    | HAMA    | 521   |
|                               |       |           |           |                       |        |      |          |       | Depression | HAMD    | 247   |
|                               |       |           |           | Non-medical staff     | 257    | 75.5 | 35.4±4.9 | 61.9  | Anxiety    | HAMA    | 48    |
|                               |       |           |           |                       |        |      |          |       | Depression | HAMD    | 21    |
| Luo et al., 2020              | China | 2020/2/10 | 2020/2/20 | Physicians and nurses | 171    | 76.0 | 29.2±4.0 | 100.0 | Distress   | PSS-10  | 141   |
|                               |       |           |           |                       |        |      |          |       | Anxiety    | GAD-7   | 77    |
|                               |       |           |           |                       |        |      |          |       | Depression | PHQ-9   | 68    |
| Lv et al., 2020a              | China | NA        | NA        | Physicians and nurses | 7,071  | 71.2 | 33.7±4.3 |       | Anxiety    | GAD-7   | 2,519 |
|                               |       |           |           |                       |        |      |          |       | Depression | PHQ-9   | 2,614 |
|                               |       |           |           |                       |        |      |          |       | Insomnia   | ISI     | 2,487 |
| Lv et al., 2020b              | China | NA        | NA        | Physicians and nurses | 8,028  |      |          |       | Anxiety    | GAD-7   | 2,786 |
| Mei et al., 2020              | China | 2020/1/15 | 2020/2/10 | Physicians and nurses | 70     | 75.7 | 35.1±8.4 | 97.1  | Insomnia   | PSQI    | 70    |
| Moghanibashi-Mansourieh, 2020 | Iran  | 2020/3/1  | 2020/3/9  | General population    | 10,754 | 65.8 | 30.6±5.3 | 41.9  | Anxiety    | DASS-21 | 5,472 |
| Mu, 2020                      | China | 2020/1/31 | 2020/2/11 | General population    | 217    | 53.5 | 65.5±7.5 | 10.1  | Anxiety    | GAD-7   | 17    |
|                               |       |           |           |                       |        |      |          |       | Depression | PHQ-9   | 12    |

|                    |           |           |           |                                                       |        |      |           |            |            |         |        |
|--------------------|-----------|-----------|-----------|-------------------------------------------------------|--------|------|-----------|------------|------------|---------|--------|
| Naser et al., 2020 | Jordan    | 2020/3/22 | 2020/3/28 | General population                                    | 1,798  | 64.3 | 34.3±7.7  | 83.7       | Anxiety    | GAD-7   | 1,043  |
|                    |           |           |           |                                                       |        |      |           |            | Depression | PHQ-9   | 1,199  |
|                    |           |           |           | Students                                              | 1,165  | 53.8 | 24.7±2.8  |            | Anxiety    | GAD-7   | 928    |
|                    |           |           |           |                                                       |        |      |           | Depression | PHQ-9      | 1,017   |        |
|                    |           |           |           | Physicians and nurses                                 | 1,163  | 56.1 | 30.8±6.2  |            | Anxiety    | GAD-7   | 823    |
|                    |           |           |           |                                                       |        |      |           | Depression | PHQ-9      | 907     |        |
| Qiu et al., 2020   | China     | 2020/1/31 | 2020/2/10 | General population                                    | 52,730 | 64.7 |           |            | Distress   | CPDI    | 18,155 |
| Shi et al., 2020   | China     | NA        | NA        | Noninfectious chronic disease patients                | 60     | 53.3 | 46.3±12.1 | 55.0       | Anxiety    | SAS     | 32     |
| Tan et al., 2020   | Singapore | 2020/2/19 | 2020/3/13 | Physicians and nurses                                 | 296    | 68.2 | 30(28-35) |            | Distress   | DASS-21 | 19     |
|                    |           |           |           |                                                       |        |      |           |            | Anxiety    | DASS-21 | 32     |
|                    |           |           |           |                                                       |        |      |           |            | Depression | DASS-21 | 24     |
|                    |           |           |           | Non-medical staff                                     | 174    | 68.4 | 33(28-39) |            | Anxiety    | DASS-21 | 36     |
|                    |           |           |           |                                                       |        |      |           |            | Depression | DASS-21 | 18     |
|                    |           |           |           |                                                       |        |      |           |            | Distress   | DASS-21 | 12     |
| Wang et al., 2020a | China     | 2020/1/31 | 2020/2/2  | General population                                    | 1,210  | 67.3 | 26.0±4.6  | 87.9       | Anxiety    | DASS-21 | 440    |
|                    |           |           |           |                                                       |        |      |           |            | Depression | DASS-21 | 367    |
|                    |           |           |           |                                                       |        |      |           |            | Distress   | DASS-21 | 389    |
| Wang et al., 2020b | China     | 2020/2/6  | 2020/2/9  | General population                                    | 600    | 55.5 | 32±12     | 73.2       | Anxiety    | SAS     | 38     |
|                    |           |           |           |                                                       |        |      |           |            | Depression | SDS     | 103    |
| Wang et al., 2020c | China     | 2020/1/31 | 2020/2/2  | General population                                    | 4,827  | 67.7 | 32.3±10.0 | 78.5       | Anxiety    | GAD-7   | 2,669  |
|                    |           |           |           |                                                       |        |      |           |            | Depression | WHO-5   | 2,331  |
| Wang et al., 2020d | China     | 2020/2/6  | 2020/2/8  | Students                                              | 396    | 49.7 | 12.8±2.6  |            | Depression | DSRS    | 41     |
| Wu et al., 2020b   | China     | 2020/1/1  | 2020/2/9  | General population                                    | 1,285  |      | 30(27-32) | 79.7       | Depression | EPDS    | 381    |
| Xia et al., 2020   | China     | 2020/2/24 | 2020/2/29 | Noninfectious chronic disease patients (peritoneal)   | 156    | 59.6 | 45.4±7.0  | 30.1       | Distress   | IES     | 67     |
|                    |           |           |           | Noninfectious chronic disease patients (hemodialysis) | 76     | 46.1 | 43.9±5.8  | 35.5       | Distress   | IES     | 43     |

|                     |       |           |           |                                        |       |      |           |          |            |       |       |
|---------------------|-------|-----------|-----------|----------------------------------------|-------|------|-----------|----------|------------|-------|-------|
| Xiao et al., 2020   | China | 2020/2/6  | 2020/2/8  | Physicians and nurses                  | 432   | 67.8 | 37.2±3.0  |          | Anxiety    | SAS   | 53    |
|                     |       |           |           |                                        |       |      |           |          | Depression | SDS   | 96    |
| Xu et al., 2020     | China | 2020/2/7  | 2020/2/15 | Physicians and nurses                  | 360   | 80.8 | 34.8±7.1  |          | Anxiety    | SAS   | 68    |
|                     |       |           |           |                                        |       |      |           |          | Depression | SDS   | 138   |
| Yang et al., 2020a  | China | NA        | NA        | General population                     | 176   | 67.0 | 34.7±5.0  | 88.6     | Anxiety    | SAS   | 71    |
| Yang et al., 2020b  | China | 2020/2/1  | 2020/2/1  | Noninfectious chronic disease patients | 50    | 36.0 | 51.2±4.3  |          | Anxiety    | SAS   | 36    |
| Yin et al., 2020    | China | 2020/2/4  | 2020/2/18 | General population                     | 8,151 | 56.9 | 31.7±13.7 | 71.3     | Anxiety    | GAD-7 | 627   |
|                     |       |           |           |                                        |       |      |           |          | Depression | PHQ-9 | 1,241 |
| Ying et al., 2020   | China | 2020/2/10 | 2020/2/20 | General population                     | 845   | 47.3 | 38.0±9.4  | 87.8     | Anxiety    | GAD-7 | 285   |
|                     |       |           |           |                                        |       |      |           |          | Depression | PHQ-9 | 248   |
| Yuan et al., 2020   | China | 2020/1/27 | 2020/2/24 | Quarantined persons                    | 145   | 55.9 | 45.2±16.6 | 37.9     | Anxiety    | SAS   | 126   |
|                     |       |           |           |                                        |       |      |           |          | Depression | SDS   | 102   |
| Zhang et al., 2020a | China | NA        | NA        | Noninfectious chronic disease patients | 75    | 38.7 | 44.2±14.0 | 56.0     | Anxiety    | SAS   | 31    |
|                     |       |           |           |                                        |       |      |           |          | Depression | SDS   | 37    |
| Zhang et al., 2020c | China | 2020/1/29 | 2020/2/3  | Physicians and nurses                  | 1,563 | 82.7 | 31.5±5.1  | 97.9     | Anxiety    | GAD-7 | 864   |
|                     |       |           |           |                                        |       |      |           |          | Depression | PHQ-9 | 792   |
|                     |       |           |           | Non-medical staff                      | 125   |      |           | Insomnia | ISI        | 564   |       |
|                     |       |           |           |                                        |       |      |           | Insomnia | ISI        | 45    |       |
| Zhang et al., 2020d | China | 2020/2/15 | 2020/2/29 | General population                     | 98    | 65.3 | 29.6±12.7 | 41.8     | Anxiety    | GAD-7 | 38    |
|                     |       |           |           |                                        |       |      |           |          | Depression | GHQ-9 | 49    |
|                     |       |           |           | Quarantined persons                    | 50    | 46.0 | 36.2±10.9 | 42.0     | Anxiety    | GAD-7 | 14    |
|                     |       |           |           |                                        |       |      |           |          | Depression | GHQ-9 | 15    |
|                     |       |           |           | COVID-19 patients                      | 57    | 49.1 | 46.9±15.4 | 40.4     | Anxiety    | GHQ-9 | 26    |
|                     |       |           |           |                                        |       |      |           |          | Depression | GHQ-9 | 36    |
| Zhang et al., 2020e | China | 2020/2/19 | 2020/3/6  | Non-medical staff                      | 1,255 | 57.6 |           |          | Anxiety    | GAD-7 | 107   |
|                     |       |           |           |                                        |       |      |           |          | Depression | PHQ-9 | 119   |
|                     |       |           |           |                                        |       |      |           |          | Insomnia   | ISI   | 383   |
|                     |       |           |           | Physicians and nurses                  | 927   | 73.1 |           |          | Anxiety    | GAD-7 | 121   |
| Depression          | PHQ-9 | 113       |           |                                        |       |      |           |          |            |       |       |

|                     |       |           |           |                                        |       |      |          |       |            |       |       |
|---------------------|-------|-----------|-----------|----------------------------------------|-------|------|----------|-------|------------|-------|-------|
|                     |       |           |           |                                        |       |      |          |       | Insomnia   | ISI   | 356   |
| Zhang et al., 2020f | China | NA        | NA        | Students                               | 1,486 | 69.5 | 21.7±2.3 | 100.0 | Anxiety    | GAD-7 | 231   |
|                     |       |           |           |                                        |       |      |          |       | Depression | PHQ-9 | 528   |
| Zheng et al., 2020a | China | 2020/2/18 | 2020/2/21 | Physicians and nurses                  | 373   | 74.5 | 34.7±4.5 | 85.5  | Depression | PHQ-9 | 117   |
| Zheng et al., 2020b | China | NA        | NA        | Noninfectious chronic disease patients | 86    | 81.4 |          |       | Depression | SDS   | 35    |
| Zhou et al., 2020   | China | 2020/2/9  | 2020/2/11 | General population                     | 248   | 57.7 | 36.1±4.8 | 75.8  | Anxiety    | PHQ-4 | 58    |
|                     |       |           |           |                                        |       |      |          |       | Depression | PHQ-4 | 62    |
|                     |       |           |           | Physicians and nurses                  | 258   | 67.1 | 38.6±4.0 | 97.7  | Anxiety    | PHQ-4 | 51    |
|                     |       |           |           |                                        |       |      |          |       | Depression | PHQ-4 | 54    |
| Zhu et al., 2020b   | China | 2020/2/8  | 2020/2/10 | Physicians and nurses                  | 5,062 | 85.0 | 32.5±7.5 |       | Anxiety    | GAD-7 | 1,218 |
|                     |       |           |           |                                        |       |      |          |       | Depression | PHQ-9 | 681   |
|                     |       |           |           | Non-medical staff                      | 641   |      |          |       | Anxiety    | GAD-7 | 123   |
|                     |       |           |           |                                        |       |      |          |       | Depression | PHQ-9 | 78    |

Note: C, Cross-sectional study; N, Non-randomized controlled study; Q, Qualitative interview; R, Randomized controlled trial; CPDI, COVID-19 Peritraumatic Distress Index; PHQ-9, Patient Health Questionnaire-9; GAD-7, Generalized Anxiety Disorder-7; PSQI, Pittsburgh sleep quality index; SAS, Self-Rating Anxiety Scale; SDS, Self-Rating Depression Scale; DASS-21, Depression, Anxiety and Stress Scale-21; HAMA, Hamilton Anxiety Scale; HAMD, Hamilton Depression Scale; IES, Impact of Event Scale; K6, the six-item Kessler psychological distress scale; ISI, Insomnia Severity Index; SCL-90, Symptom Checklist-90; PPS-10, 10-term Perceived Stress Scale; SCARED, Screen for Child Anxiety Related Emotional Disorder; DSRS, Depression Self-rating Scale for Children; CES-D, Center for Epidemiology Scale for Depression; WHO-5, WHO-Five Well-Being Index; SRQ-20, Self-rating questionnaire-20; PHQ-4, patient health questionnaire-4; EPDS, Edinburgh Postnatal Depression Scale; GHQ-12, general health questionnaire-12; BAI, Beck Anxiety Inventory; BDI-II, Beck Depression Inventory-II; GHQ-9, general health questionnaire-9.



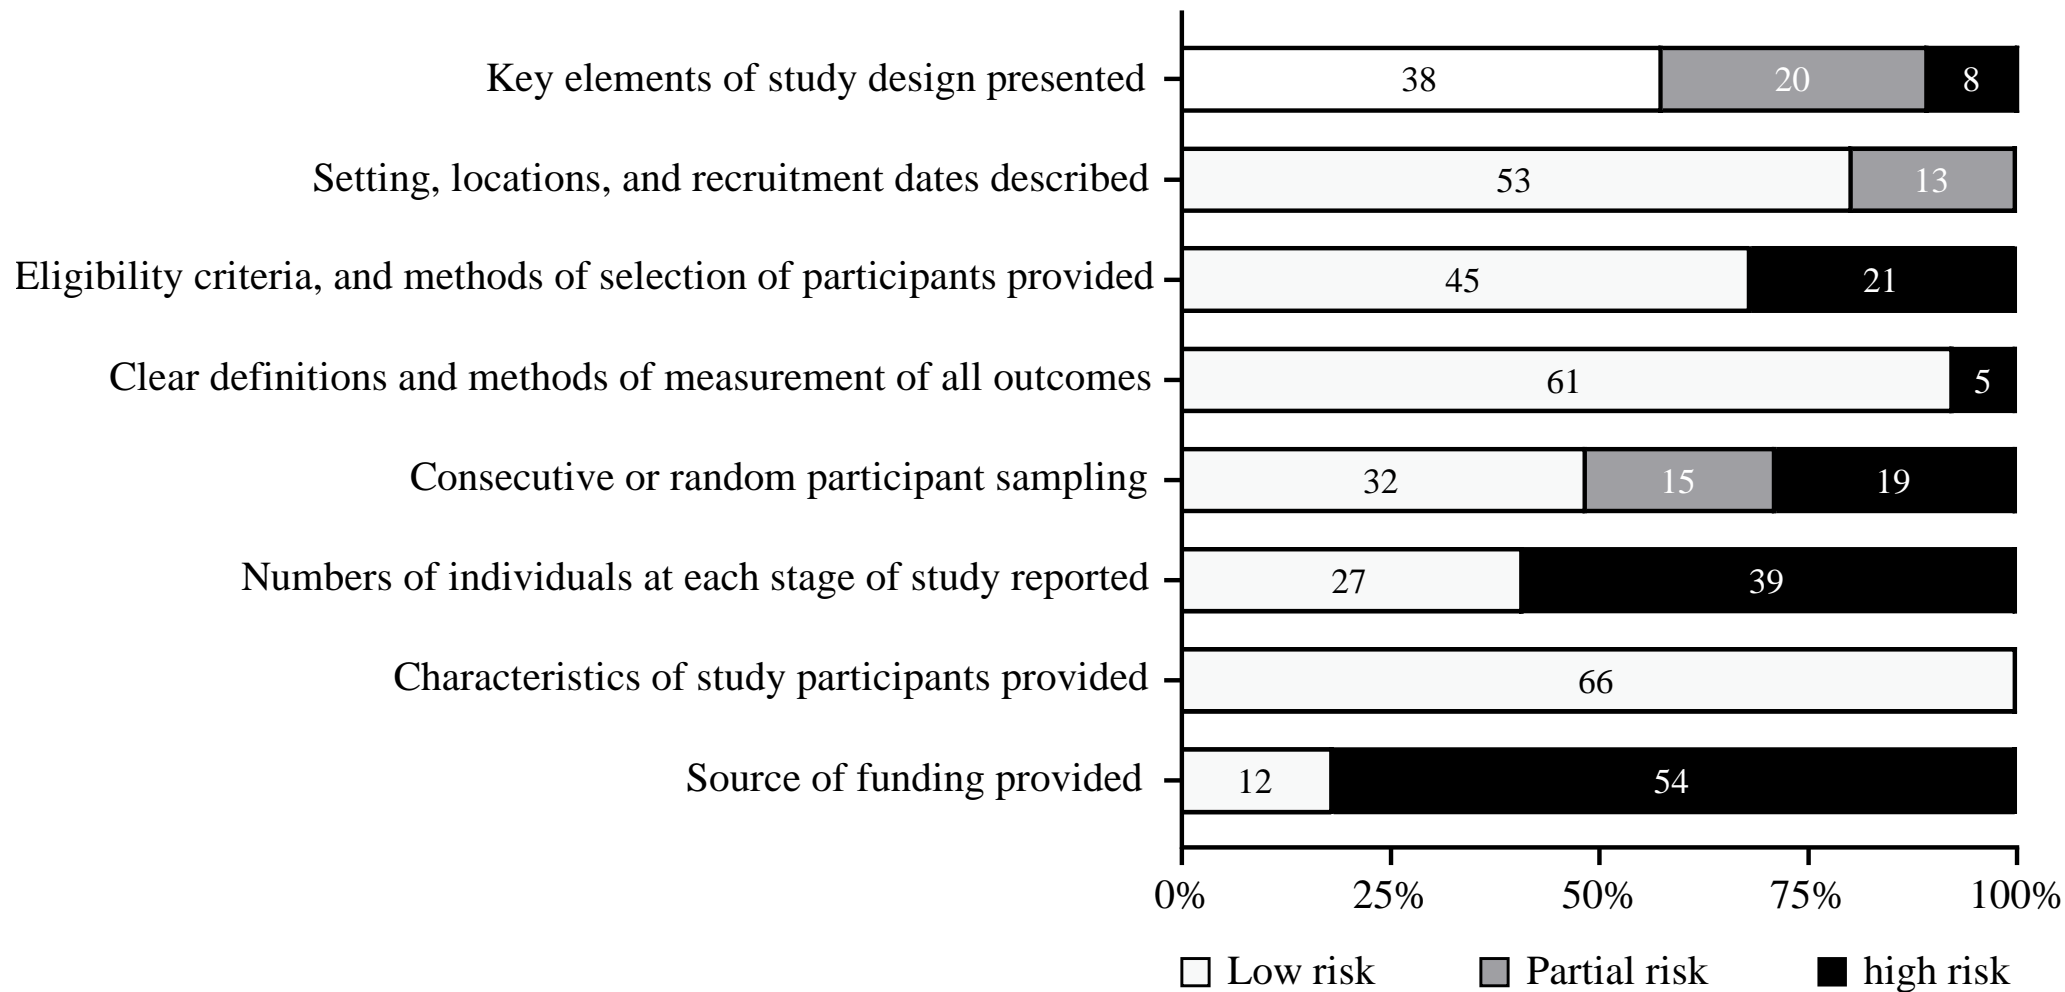

Supplementary Figure S1 Overall risk of bias of included studies (Strengthening the Reporting of Observational Studies in Epidemiology)

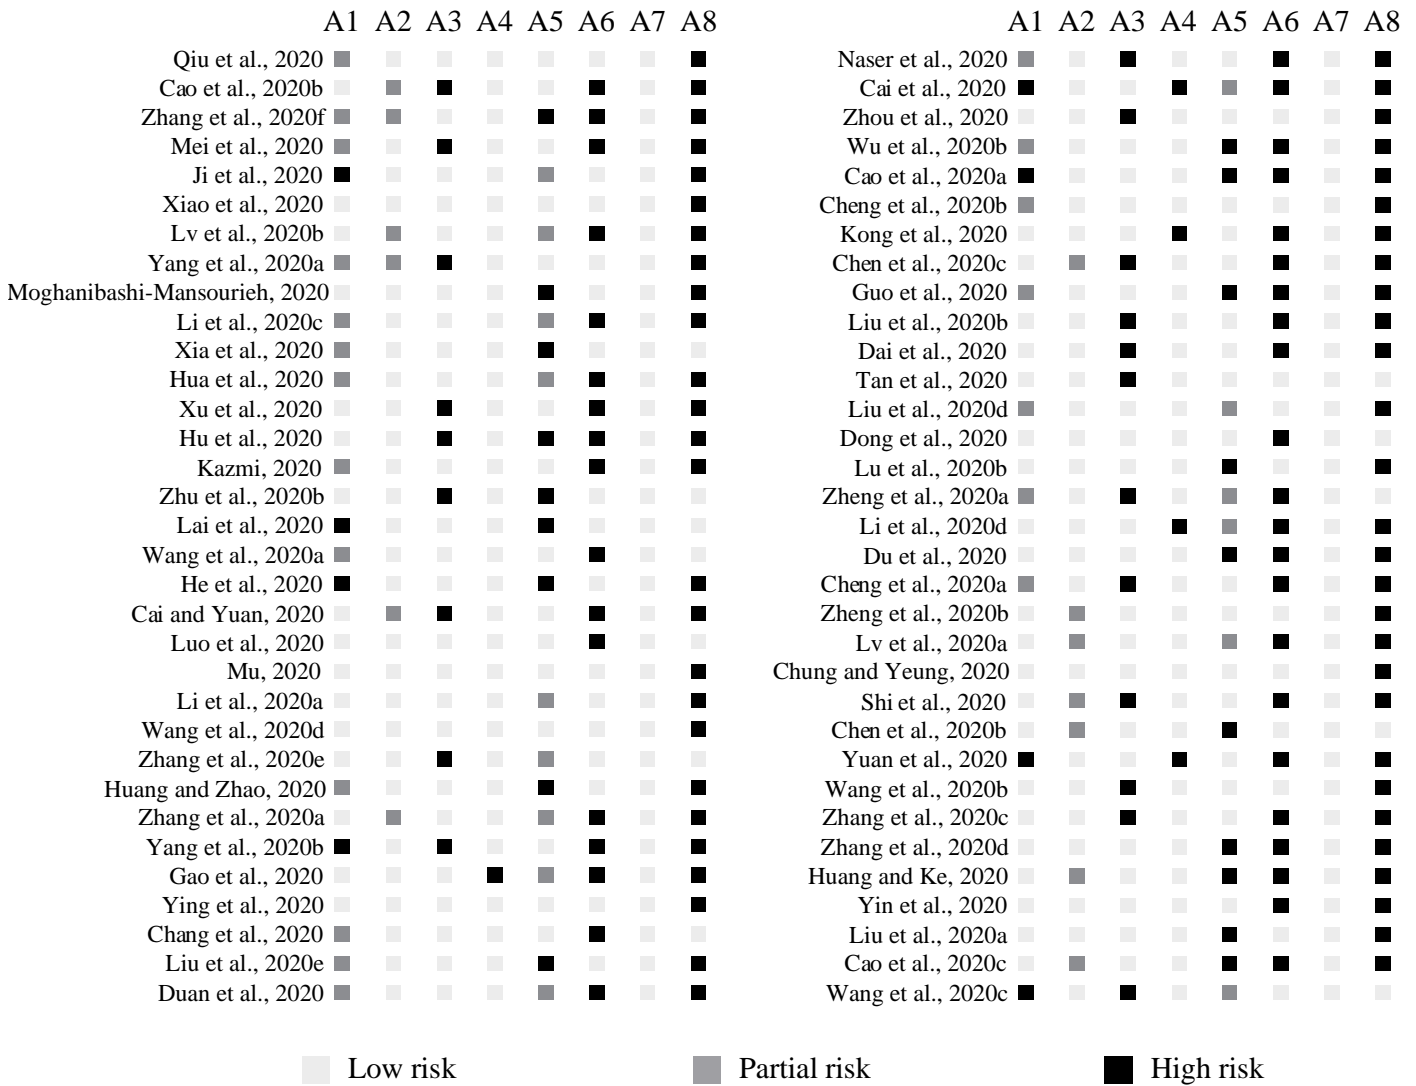

**Supplementary Figure S2 Methodological quality assessment of included studies (Strengthening the Reporting of Observational Studies in Epidemiology)**

Note: A1: Key elements of study design presented; A2: Setting, locations, and recruitment dates described; A3: Eligibility criteria, and methods of selection of participants provided; A4: Clear definitions and methods of measurement of all outcomes; A5: Consecutive or random participant sampling; A6: Numbers of individuals at each stage of study reported; A7: Characteristics of study participants provided; A8: Source of funding provided.

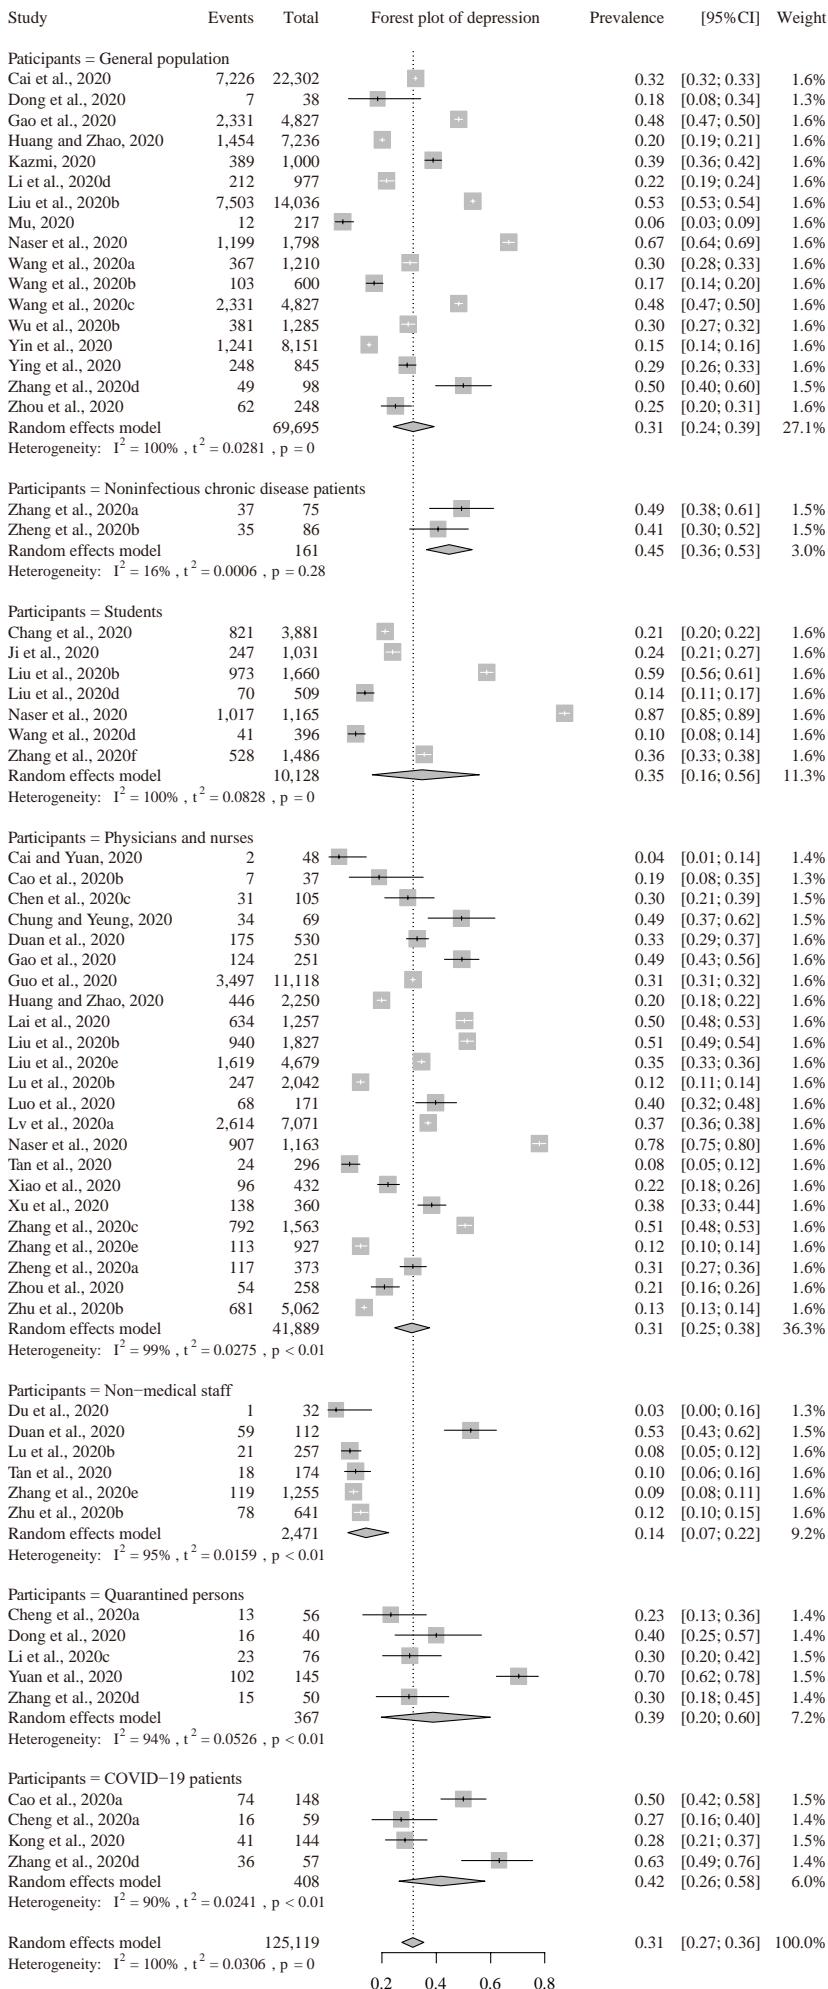

**Supplementary Figure S3 Forest plot of pooled prevalence of depression**

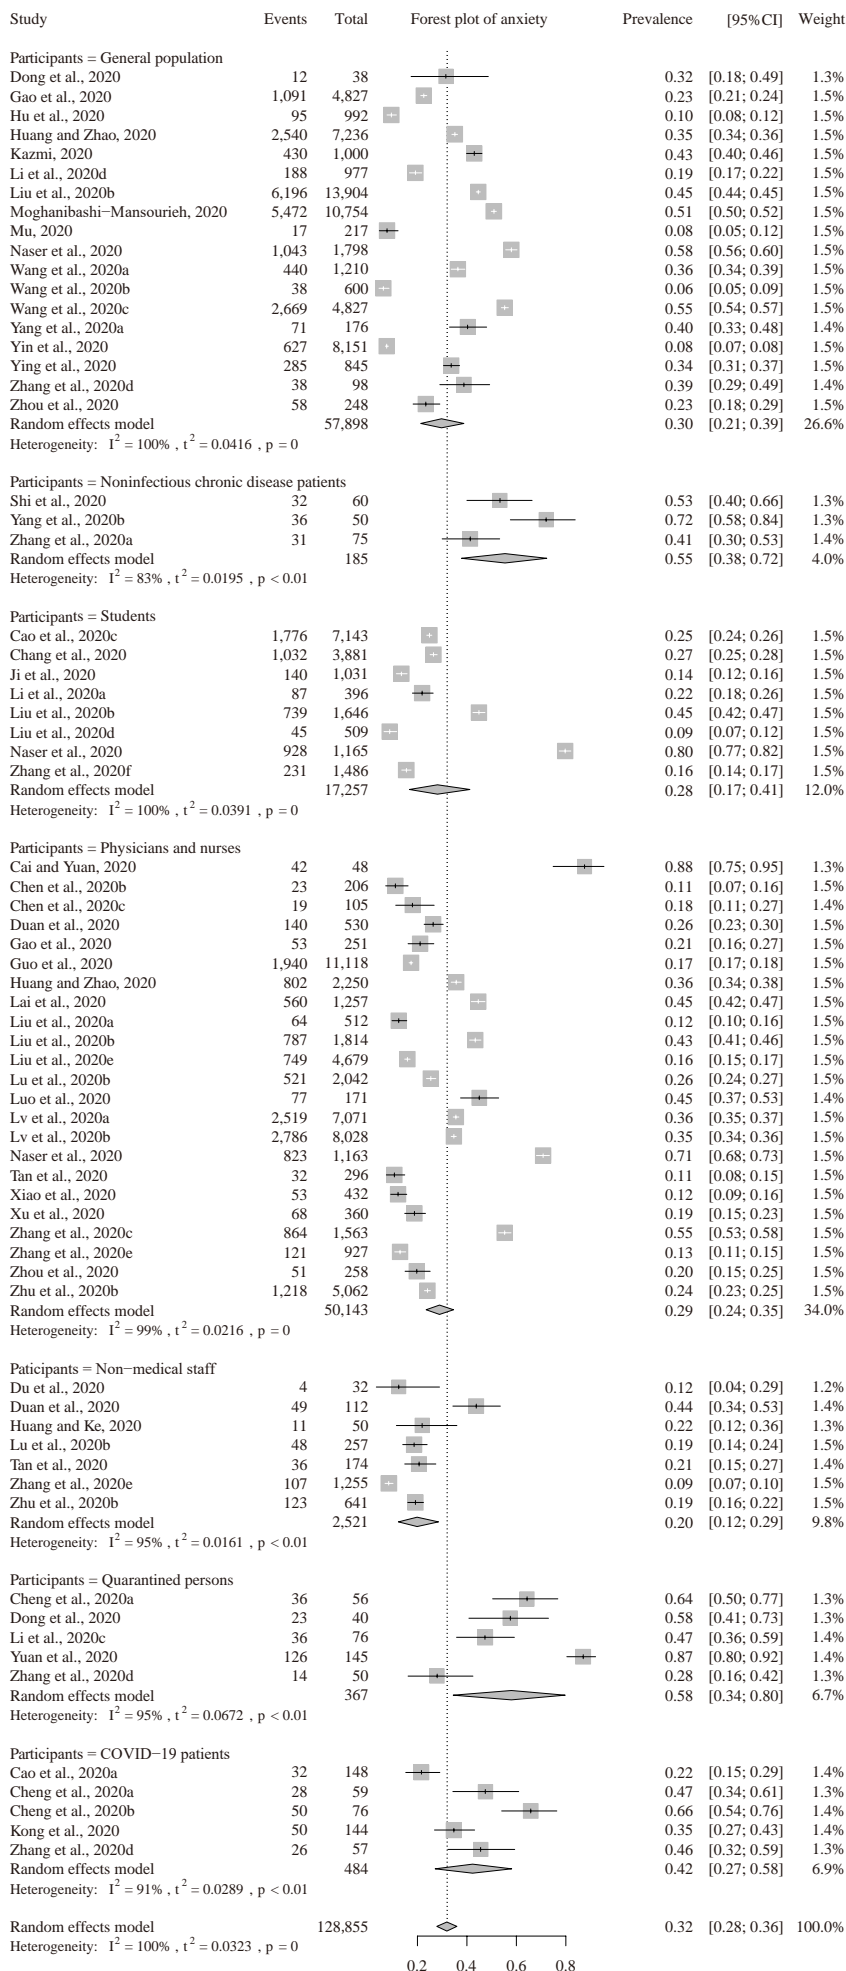

**Supplementary Figure S4 Forest plot of pooled prevalence of anxiety**

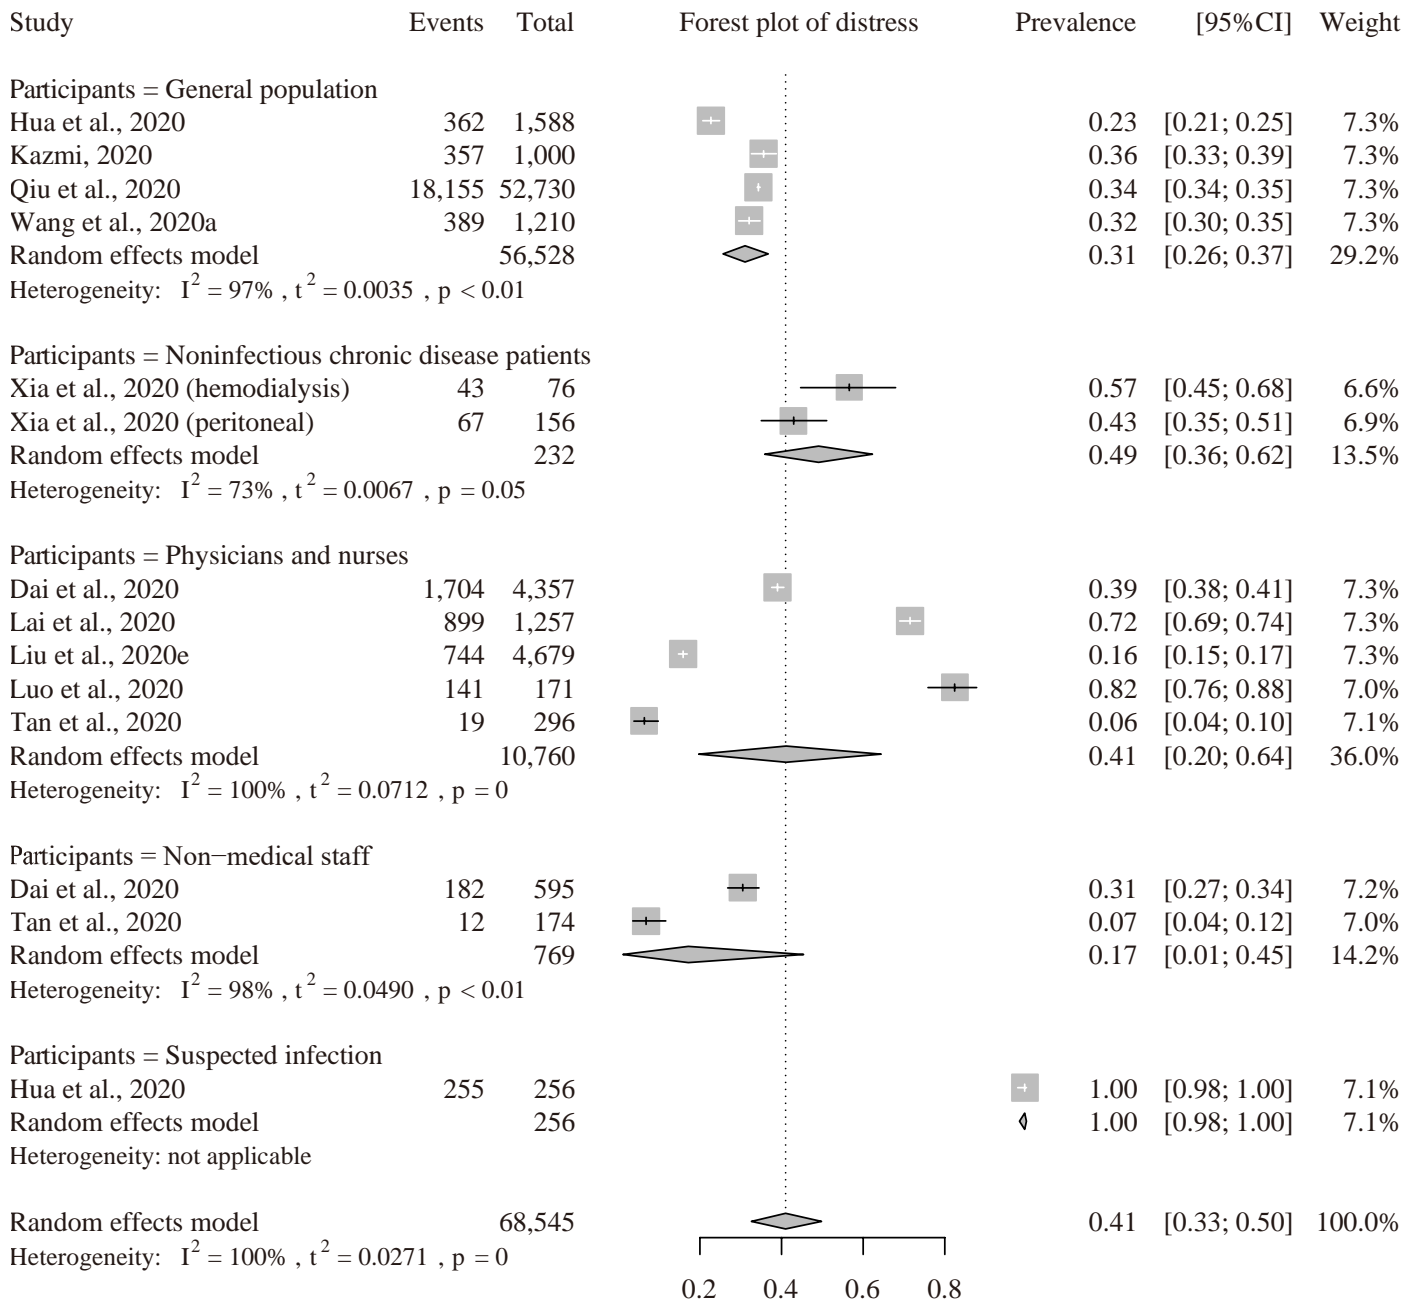

**Supplementary Figure S5 Forest plot of pooled prevalence of distress**

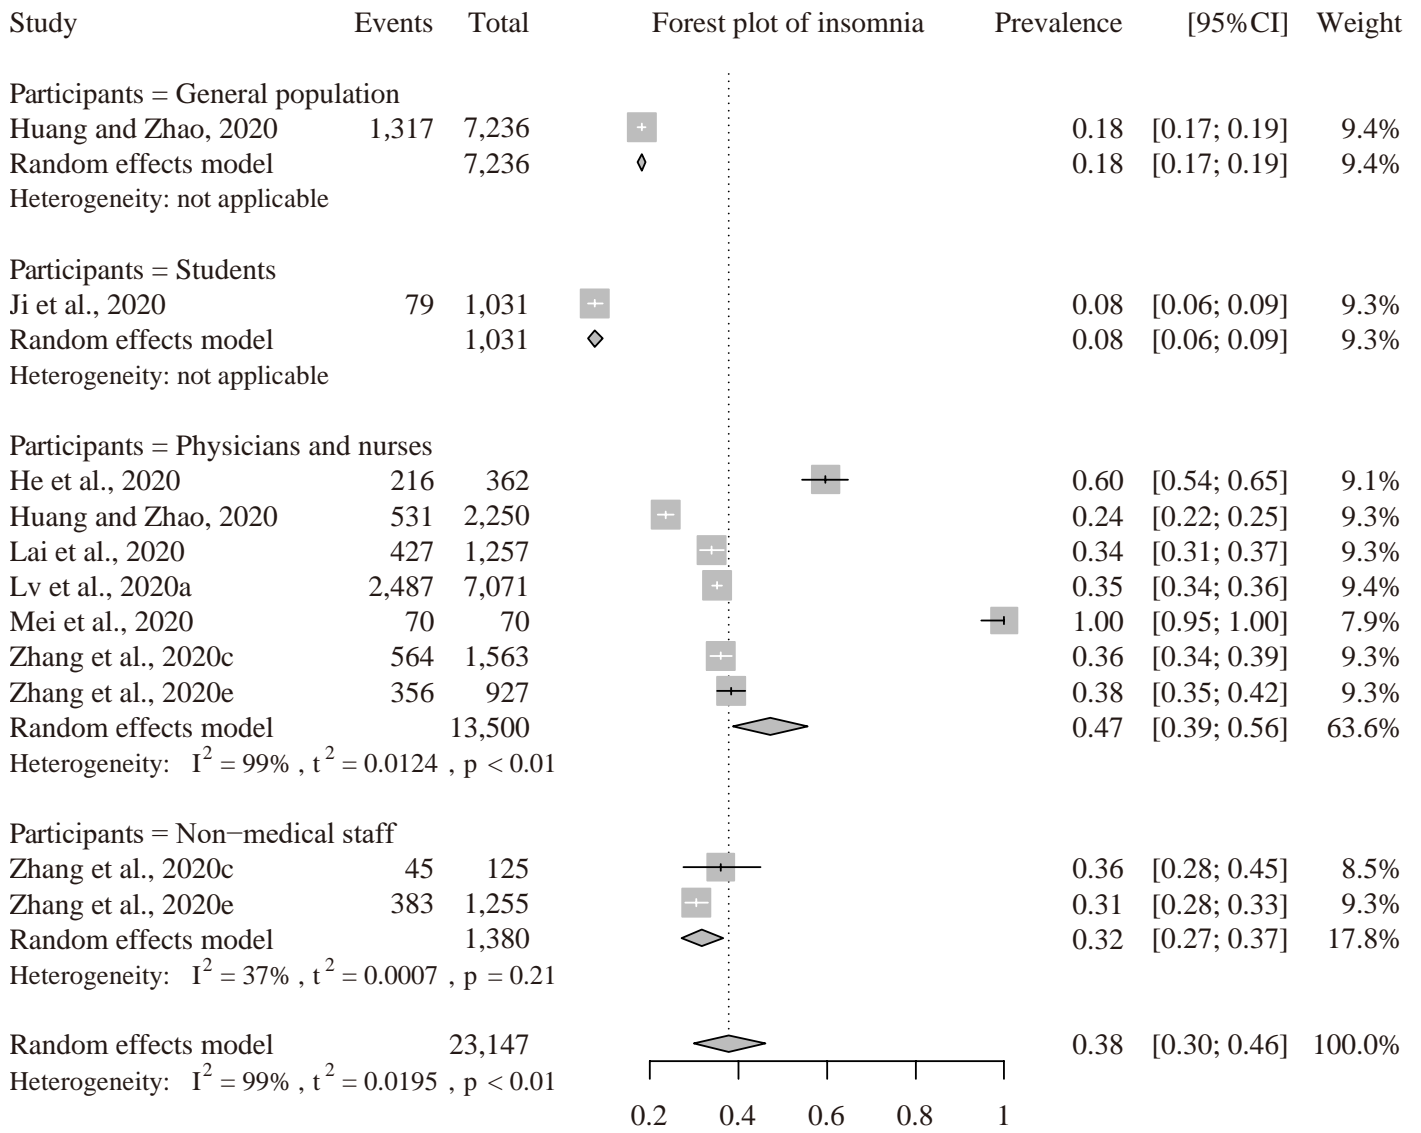

**Supplementary Figure S6 Forest plot of pooled prevalence of insomnia**

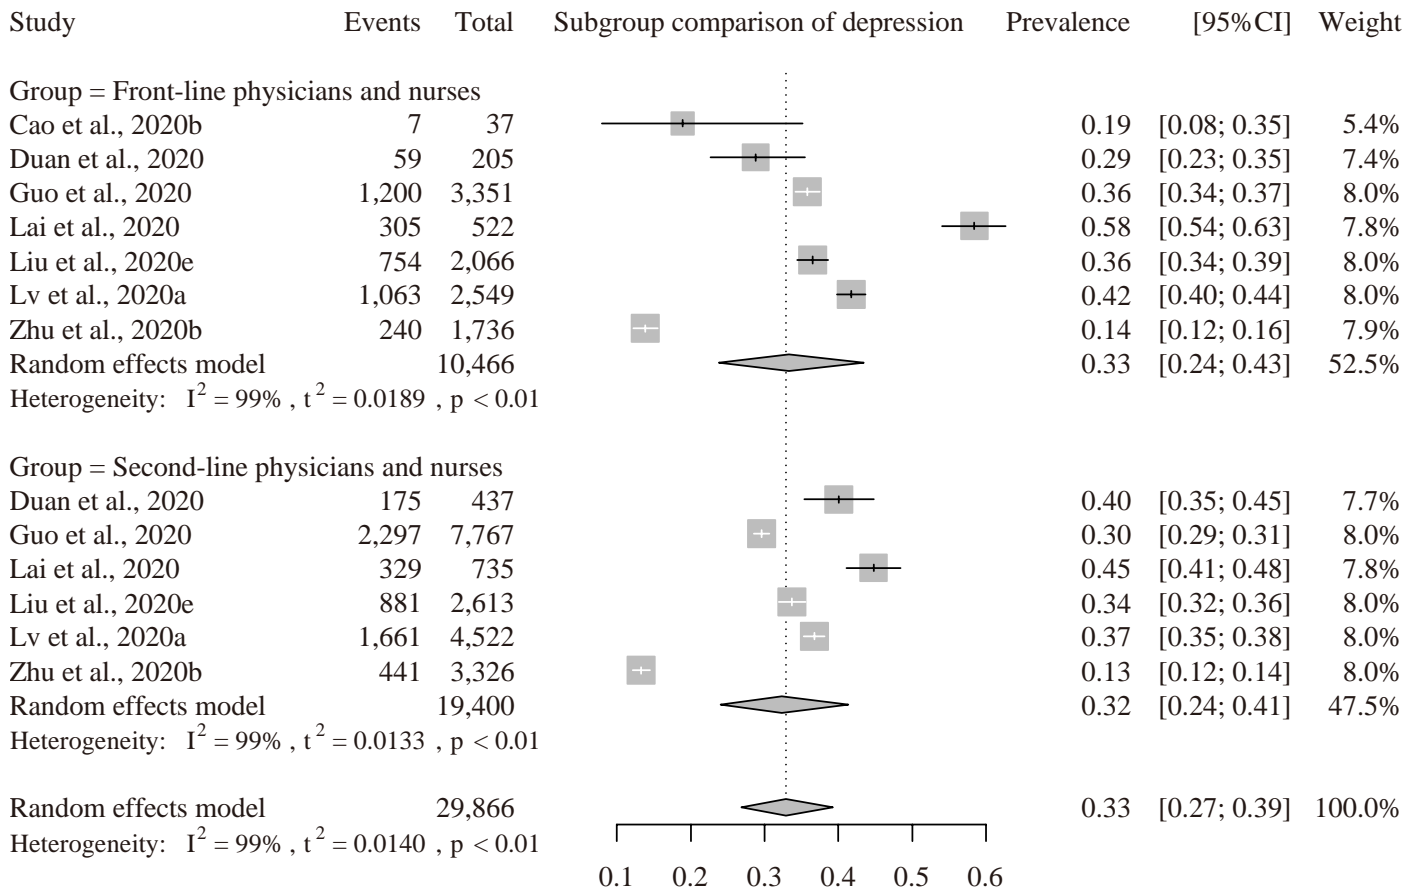

**Supplementary Figure S7 Subgroup comparison of depression between front- and second-line medical personnel**

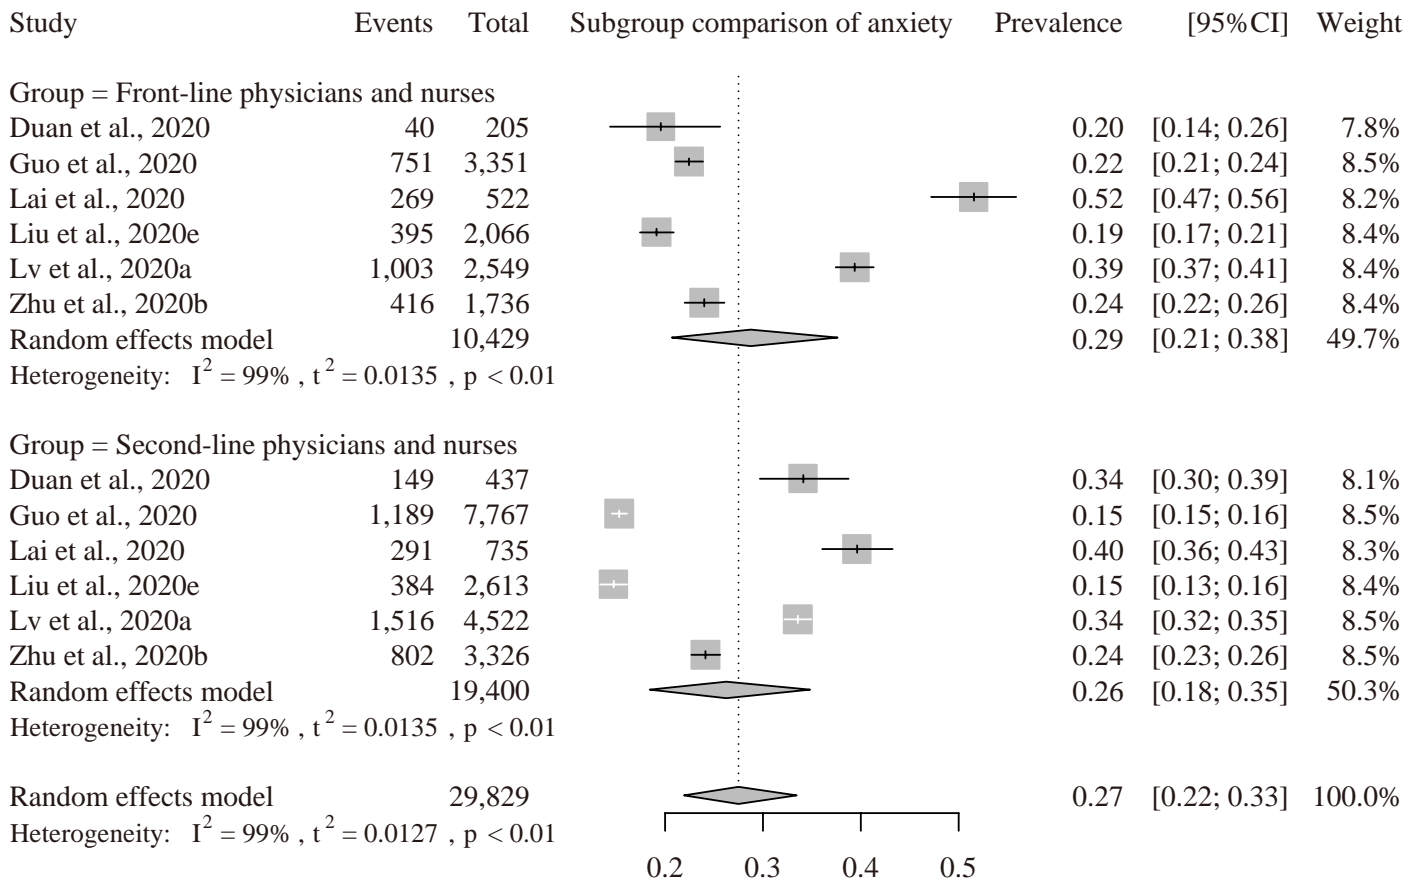

**Supplementary Figure S8 Subgroup comparison of anxiety between front- and second-line medical personnel**



**Supplementary Table S3 Meta-regression of factors affecting heterogeneity for depression**

|                                        | <b>Est.</b> | <b>S.E.</b> | <b>95%CI of Est.</b> | <b>P value</b> |
|----------------------------------------|-------------|-------------|----------------------|----------------|
| Participants                           |             |             |                      |                |
| General population (ref)               |             |             |                      |                |
| Noninfectious chronic disease patients | 0.1532      | 0.1776      | -0.195–0.5013        | 0.3886         |
| Students                               | 0.0923      | 0.1135      | -0.1302–0.3148       | 0.4163         |
| Physicians and Nurses                  | 0.0512      | 0.0945      | -0.134–0.2364        | 0.5877         |
| Non-medical staff                      | -0.1829     | 0.1419      | -0.4611–0.0953       | 0.1976         |
| Quarantined persons                    | 0.1826      | 0.1439      | -0.0995–0.4648       | 0.2045         |
| COVID-19 patients                      | 0.2050      | 0.1594      | -0.1074–0.5174       | 0.1984         |
| Published language                     |             |             |                      |                |
| Chinese (ref)                          |             |             |                      |                |
| English                                | 0.0686      | 0.0743      | -0.0769–0.2142       | 0.3555         |
| Gender                                 |             |             |                      |                |
| Male (ref)                             |             |             |                      |                |
| Female                                 | -0.0026     | 0.0036      | -0.0098–0.0045       | 0.4708         |
| Measurement tools                      |             |             |                      |                |
| BDI-II (ref)                           |             |             |                      |                |
| CES-D                                  | 0.2514      | 0.2346      | -0.2084–0.7112       | 0.2839         |
| DASS-21                                | 0.2601      | 0.2174      | -0.1661–0.6863       | 0.2316         |
| DSRS                                   | 0.1174      | 0.2672      | -0.4063–0.6411       | 0.6605         |
| EPDS                                   | 0.3641      | 0.2664      | -0.158–0.8862        | 0.1716         |
| GHQ-9                                  | 0.5514      | 0.2259      | 0.1085–0.9942        | 0.0147         |
| HAMD                                   | 0.2341      | 0.2179      | -0.193–0.6612        | 0.2827         |
| PHQ-4                                  | 0.2888      | 0.2356      | -0.1729–0.7505       | 0.2202         |
| PHQ-9                                  | 0.4191      | 0.2009      | 0.0254–0.8128        | 0.0369         |
| SCL-90                                 | 0.0149      | 0.2755      | -0.5252–0.5549       | 0.9569         |
| SDS                                    | 0.4355      | 0.2054      | 0.0328–0.8382        | 0.0340         |
| WHO-5                                  | 0.5601      | 0.2233      | 0.1224–0.9977        | 0.0121         |

**Supplementary Table S4 Meta-regression of factors affecting heterogeneity for anxiety**

|                                        | <b>Est.</b> | <b>S.E.</b> | <b>95%CI of Est.</b> | <b>P value</b> |
|----------------------------------------|-------------|-------------|----------------------|----------------|
| Participants                           |             |             |                      |                |
| General population (ref)               |             |             |                      |                |
| Noninfectious chronic disease patients | 0.3898      | 0.163       | 0.0703–0.7093        | 0.0168         |
| Students                               | -0.0107     | 0.0954      | -0.1977–0.1763       | 0.9105         |
| Physicians and Nurses                  | 0.0019      | 0.0848      | -0.1643–0.1681       | 0.9821         |
| Non-medical staff                      | -0.1142     | 0.1137      | -0.3371–0.1088       | 0.3155         |
| Quarantined persons                    | 0.3145      | 0.1275      | 0.0646–0.5645        | 0.0137         |
| COVID-19 patients                      | 0.2211      | 0.1416      | -0.0565–0.4986       | 0.1185         |
| Published language                     |             |             |                      |                |
| Chinese (ref)                          |             |             |                      |                |
| English                                | -0.0219     | 0.0659      | -0.1511–0.1072       | 0.7391         |
| Gender                                 |             |             |                      |                |
| Male (ref)                             |             |             |                      |                |
| Female                                 | 0.0003      | 0.0037      | -0.0069–0.0075       | 0.9324         |
| Measurement tools                      |             |             |                      |                |
| BAI (ref)                              |             |             |                      |                |
| DASS-21                                | 0.0256      | 0.251       | -0.4664–0.5175       | 0.9188         |
| GAD-7                                  | 0.0027      | 0.2351      | -0.458–0.4635        | 0.9907         |
| GHQ-9                                  | -0.0653     | 0.3329      | -0.7178–0.5872       | 0.8444         |
| HAMA                                   | -0.1085     | 0.245       | -0.5886–0.3717       | 0.6579         |
| PHQ-4                                  | -0.1075     | 0.2773      | -0.651–0.4361        | 0.6984         |
| SAS                                    | -0.1563     | 0.2337      | -0.6144–0.3017       | 0.5036         |
| SCARED                                 | -0.1092     | 0.3301      | -0.7563–0.5379       | 0.7408         |
| SCL-90                                 | 0.5792      | 0.3139      | -0.036–1.1944        | 0.0650         |

**Supplementary Table S5 Meta-regression of factors affecting heterogeneity for distress**

|                                        | <b>Est.</b> | <b>S.E.</b> | <b>95%CI of Est.</b> | <b>P value</b> |
|----------------------------------------|-------------|-------------|----------------------|----------------|
| Participants                           |             |             |                      |                |
| General population (ref)               |             |             |                      |                |
| Noninfectious chronic disease patients | -0.7584     | 0.0747      | -0.9049--0.6119      | <0.0001        |
| Physicians and Nurses                  | -0.3339     | 0.0327      | -0.3979--0.2699      | <0.0001        |
| Non-medical staff                      | -0.3208     | 0.0409      | -0.4009--0.2407      | <0.0001        |
| Suspected infection                    | 0.9581      | 0.0369      | 0.8857--1.0305       | <0.0001        |
| Published language                     |             |             |                      |                |
| Chinese (ref)                          |             |             |                      |                |
| English                                | -0.9355     | 0.0554      | -1.044--0.827        | <0.0001        |
| Gender                                 |             |             |                      |                |
| Male (ref)                             |             |             |                      |                |
| Female                                 | -0.0082     | 0.0032      | -0.0144--0.002       | 0.0099         |
| Measurement tools                      |             |             |                      |                |
| CPDI (ref)                             |             |             |                      |                |
| DASS-21                                | -0.0056     | 0.0439      | -0.0916--0.0805      | 0.8988         |
| GHQ-12                                 | 0.367       | 0.0616      | 0.2463--0.4876       | <0.0001        |
| IES                                    | 0.7158      | 0.0695      | 0.5796--0.8519       | <0.0001        |
| K6                                     | -0.1291     | 0.0507      | -0.2285--0.0297      | 0.0109         |
| PSS-10                                 | 0.8442      | 0.078       | 0.6914--0.9971       | <0.0001        |
| SRQ-20                                 | 0.1184      | 0.0684      | -0.0157--0.2524      | 0.0836         |

**Supplementary Table S6 Meta-regression of factors affecting heterogeneity for insomnia**

|                          | <b>Est.</b> | <b>S.E.</b> | <b>95%CI of Est.</b> | <b>P value</b> |
|--------------------------|-------------|-------------|----------------------|----------------|
| Participants             |             |             |                      |                |
| General population (ref) |             |             |                      |                |
| Students                 | -1.5318     | 0.2567      | -2.0349--1.0287      | <0.0001        |
| Physicians and Nurses    | -0.2364     | 0.1407      | -0.5122--0.0393      | 0.0928         |
| Non-medical staff        | 0.083       | 0.1129      | -0.1383--0.3042      | 0.4623         |
| Published language       |             |             |                      |                |
| Chinese (ref)            |             |             |                      |                |
| English                  | -0.7515     | 0.0977      | -0.943--0.56         | <0.0001        |
| Gender                   |             |             |                      |                |
| Male (ref)               |             |             |                      |                |
| Female                   | 0.0206      | 0.0051      | 0.0105--0.0306       | <0.0001        |
| Measurement tools        |             |             |                      |                |
| ISI (ref)                |             |             |                      |                |
| PSQI                     | 0.0585      | 0.0735      | -0.0855--0.7296      | 0.4258         |

**Supplementary Table S7 Sensitivity analyses of random effects pooled prevalence of depression and anxiety**

|                                                                         | depression     |                           |                |                       | anxiety        |                           |                |                       |
|-------------------------------------------------------------------------|----------------|---------------------------|----------------|-----------------------|----------------|---------------------------|----------------|-----------------------|
|                                                                         | No. of studies | Pooled prevalence (95%CI) | I <sup>2</sup> | Q statistic (p value) | No. of studies | Pooled prevalence (95%CI) | I <sup>2</sup> | Q statistic (p value) |
| Key elements of study design presented                                  |                |                           |                |                       |                |                           |                |                       |
| Low risk                                                                | 6              | 45.2 (35.7–54.9)          | 99,3%          | 11.14 (<0.01)         | 6              | 48.4 (29.7–67.3)          | 99.40%         | 10.85 (<0.01)         |
| Partial risk                                                            | 19             | 36.9 (28.9–45.3)          | 99,6%          |                       | 19             | 39.8 (31.4–48.5)          | 99.60%         |                       |
| High risk                                                               | 39             | 26.6 (20.8–32.8)          | 99,6%          |                       | 44             | 26.5 (22.0–31.3)          | 99.50%         |                       |
| Setting, locations, and recruitment dates described                     |                |                           |                |                       |                |                           |                |                       |
| Low risk                                                                | 57             | 31.5 (27.1–36.1)          | 99.60%         | 0.04 (0.84)           | 58             | 31.6 (26.9–36.5)          | 99.60%         | 0.04 (0.85)           |
| Partial risk                                                            | 7              | 32.1 (26.9–37.5)          | 87.80%         |                       | 11             | 32.3 (26.8–38.1)          | 98.40%         |                       |
| Eligibility criteria, and methods of selection of participants provided |                |                           |                |                       |                |                           |                |                       |
| Low risk                                                                | 40             | 30.8 (27.4–34.3)          | 99.00%         | 0.04 (0.85)           | 26             | 36.9 (29.3–44.9)          | 99.50%         | 3.18 (0.07)           |
| Partial risk                                                            | 24             | 31.8 (22.9–41.4)          | 99.70%         |                       | 43             | 28.9 (24.6–33.4)          | 99.50%         |                       |
| Clear definitions and methods of measurement of all outcomes            |                |                           |                |                       |                |                           |                |                       |
| Low risk                                                                | 58             | 30.3 (25.7–35.1)          | 99.60%         | 3.90 (0.05)           | 64             | 31.5 (27.4–35.9)          | 99.60%         | 0.37 (0.54)           |
| Partial risk                                                            | 6              | 41.1 (31.6–50.9)          | 99.20%         |                       | 5              | 36.3 (22.4–51.5)          | 98.70%         |                       |
| Consecutive or random participant sampling                              |                |                           |                |                       |                |                           |                |                       |
| Low risk                                                                | 33             | 33.1 (25.4–41.3)          | 99.60%         | 1.74 (0.42)           | 15             | 26.1 (19.2–33.5)          | 99.50%         | 10.34 (0.01)          |
| Partial risk                                                            | 15             | 31.5 (25.8–37.6)          | 99.30%         |                       | 21             | 24.3 (18.8–30.3)          | 99.60%         |                       |
| High risk                                                               | 16             | 27.2 (21.8–33.0)          | 99.20%         |                       | 33             | 40.1 (32.0–48.5)          | 99.60%         |                       |
| Numbers of individuals at each stage of study reported                  |                |                           |                |                       |                |                           |                |                       |
| Low risk                                                                | 24             | 20.1 (15.2–25.6)          | 99.30%         | 24.19 (<0.01)         | 42             | 38.4 (32.9–44.1)          | 99.60%         | 13.87 (<0.01)         |
| Partial risk                                                            | 40             | 39.1 (33.9–44.3)          | 99.50%         |                       | 27             | 22.8 (17.2–28.9)          | 99.50%         |                       |
| Source of funding provided                                              |                |                           |                |                       |                |                           |                |                       |
| Low risk                                                                | 14             | 23.1 (15.0–32.4)          | 99.50%         | 4.11 (0.04)           | 14             | 27.2 (18.8–36.4)          | 99.40%         | 1.31 (0.25)           |
| Partial risk                                                            | 50             | 33.8 (29.3–38.5)          | 99.60%         |                       | 55             | 33.1 (28.6–37.9)          | 99.60%         |                       |

**Supplementary Table S8 Sensitivity analysis of random effects pooled prevalence of distress and insomnia**

|                                                                         | distress       |                           |                |                       | insomnia       |                           |                |                       |
|-------------------------------------------------------------------------|----------------|---------------------------|----------------|-----------------------|----------------|---------------------------|----------------|-----------------------|
|                                                                         | No. of studies | Pooled prevalence (95%CI) | I <sup>2</sup> | Q statistic (p value) | No. of studies | Pooled prevalence (95%CI) | I <sup>2</sup> | Q statistic (p value) |
| Key elements of study design presented                                  |                |                           |                |                       |                |                           |                |                       |
| Low risk                                                                | 1              | 71.5 (69.0–74.0)          | NA             | 36.83 (< 0.01)        | 5              | 35.0 (32.6–37.5)          | 76.50%         | 2.92 (0.23)           |
| Partial risk                                                            | 8              | 44.0 (32.9–55.4)          | 99.60%         |                       | 3              | 50.4 (32.8–68.0)          | 99.40%         |                       |
| High risk                                                               | 5              | 30.5 (13.6–50.6)          | 99.10%         |                       | 3              | 31.4 (7.9–61.7)           | 99.60%         |                       |
| Setting, locations, and recruitment dates described                     |                |                           |                |                       |                |                           |                |                       |
| Low risk                                                                | 14             | 41.1 (32.6–49.8)          | 99.60%         | NA                    | 10             | 38.3 (29.2–47.9)          | 99.20%         | 0.45 (0.50)           |
| Partial risk                                                            | 0              | NA                        | NA             |                       | 1              | 35.2 (34.1–36.3)          | NA             |                       |
| Eligibility criteria, and methods of selection of participants provided |                |                           |                |                       |                |                           |                |                       |
| Low risk                                                                | 4              | 18.8 (6.2–36.3)           | 99.00%         | 8.68 (< 0.01)         | 6              | 28.2 (18.9–38.6)          | 99.50%         | 7.15 (0.01)           |
| Partial risk                                                            | 10             | 51.0 (39.2–62.8)          | 99.70%         |                       | 5              | 50.8 (37.8–63.8)          | 98.30%         |                       |
| Clear definitions and methods of measurement of all outcomes            |                |                           |                |                       |                |                           |                |                       |
| Low risk                                                                | 14             | 41.1 (32.6–49.8)          | 99.60%         | NA                    | 11             | 37.9 (29.9–46.2)          | 99.30%         | NA                    |
| Partial risk                                                            | 0              | NA                        | NA             |                       | 0              | NA                        | NA             |                       |
| Consecutive or random participant sampling                              |                |                           |                |                       |                |                           |                |                       |
| Low risk                                                                | 4              | 46.0 (12.1–82.1)          | 99.80%         | 1.15 (0.56)           | 4              | 32.9 (21.6–45.2)          | 99.20%         | 2.89 (0.24)           |
| Partial risk                                                            | 2              | 70.5 (0.0–100.0)          | 99.90%         |                       | 3              | 64.4 (23.1–95.8)          | 99.00%         |                       |
| High risk                                                               | 8              | 31.8 (25.9–38.0)          | 99.50%         |                       | 4              | 26.7 (14.7–40.7)          | 99.40%         |                       |
| Numbers of individuals at each stage of study reported                  |                |                           |                |                       |                |                           |                |                       |
| Low risk                                                                | 7              | 51.7 (36.7–66.4)          | 99.40%         | 3.90 (0.05)           | 4              | 55.2 (41.4–68.5)          | 98.60%         | 9.56 (< 0.01)         |
| Partial risk                                                            | 7              | 30.9 (18.3–45.1)          | 99.70%         |                       | 7              | 29.0 (20.3–38.4)          | 99.20%         |                       |
| Source of funding provided                                              |                |                           |                |                       |                |                           |                |                       |
| Low risk                                                                | 7              | 41.5 (31.4–52.1)          | 99.70%         | 0 (0.95)              | 3              | 34.2 (30.0–38.6)          | 86.40%         | 0.85 (0.36)           |
| Partial risk                                                            | 7              | 40.6 (18.9–64.4)          | 99.40%         |                       | 8              | 39.5 (29.2–50.3)          | 99.50%         |                       |

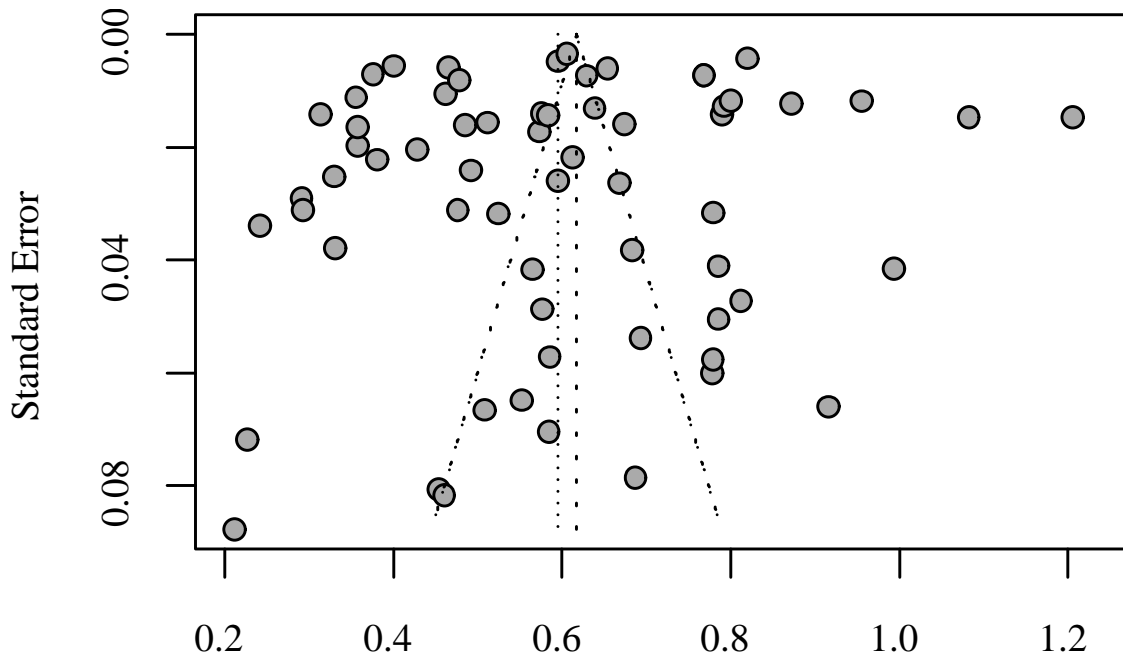

Freeman–Tukey Double Arcsine Transformed Prevalence of Depression

Egger regression:  $\beta=-1.173$ ,  $SE=2.817$ ,  $p=0.679$

Supplementary Figure S9 Funnel plots and Egger regression of depression

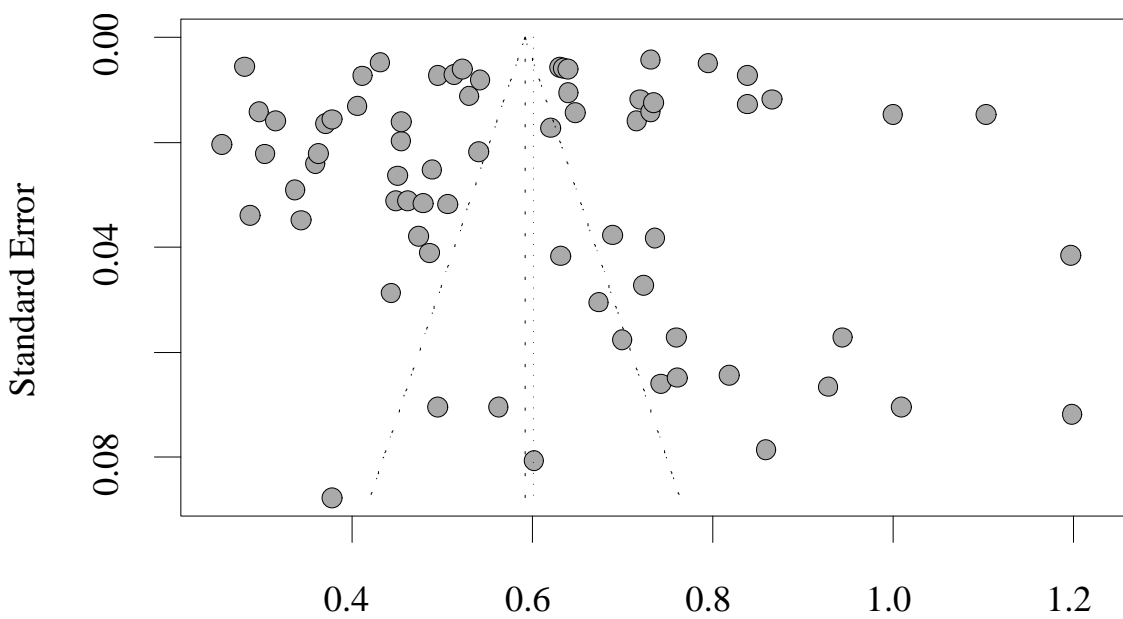

Freeman–Tukey Double Arcsine Transformed Prevalence of Anxiety

Egger regression:  $\beta=-0.590$ ,  $SE=2.830$ ,  $p=0.835$

Supplementary Figure S10 Funnel plots and Egger regression of anxiety

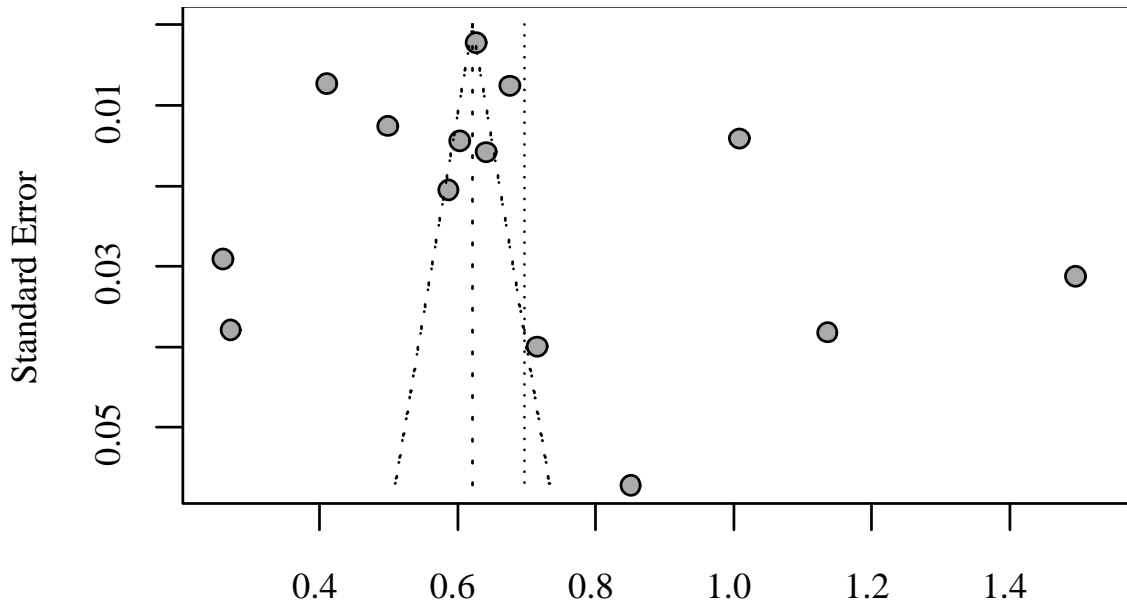

Freeman–Tukey Double Arcsine Transformed Prevalence of Distress

Egger regression:  $\beta=2.681$ ,  $SE=5.327$ ,  $p=0.624$

Supplementary Figure S11 Funnel plots and Egger regression of distress

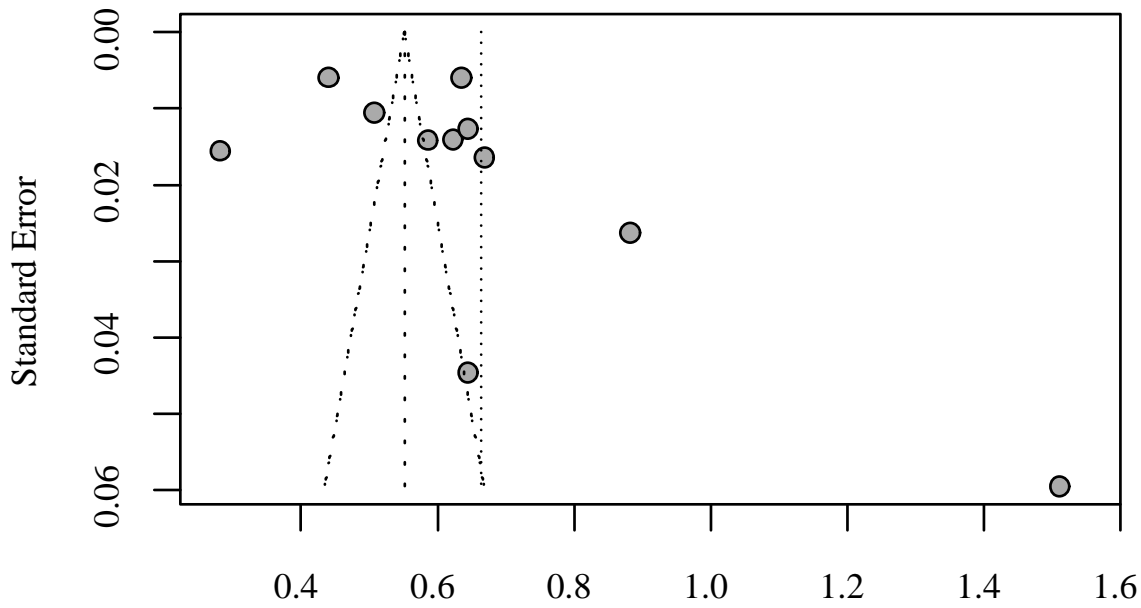

Freeman–Tukey Double Arcsine Transformed Prevalence of Insomnia

Egger regression:  $\beta=8.617$ ,  $SE=6.582$ ,  $p=0.223$

Supplementary Figure S12 Funnel plots and Egger regression of insomnia

## References

- 1 Cai, F., Yuan, Q., 2020. Investigation and intervention of mental health of first-line medical staff during the pandemic of COVID-19 [In Chinese]. *Chinese General Practice Nursing* 18, 827-828.
- 2 Cai, H., Zhu, Y., Lei, L., Pan, C., Zhu, L., Li, J., Gu, J., Hao, Y., 2020. Novel coronavirus pneumonia epidemic-related knowledge, behaviors and psychology status among college students and their family members and friends: an internet-based cross-sectional survey. *Chin J Publ Heal* 36, 152-155.
- 3 Cao, J., Min, W., Yirong, S., Youchun, W., Qing, H., 2020a. Prevalence and factors associated with anxiety and depression in patients with Coronavirus disease 2019. *Journal of Nursing Science*. Available at: <http://kns.cnki.net/kcms/detail/42.1154.r.20200319.0928.004.html>.
- 4 Cao, J., Wei, J., Zhu, H., Duan, Y., Geng, W., Hong, X., Jiang, J., Zhao, X., Zhu, B., 2020b. A Study of Basic Needs and Psychological Wellbeing of Medical Workers in the Fever Clinic of a Tertiary General Hospital in Beijing during the COVID-19 Outbreak. *Psychotherapy and psychosomatics* 89, 252-254.
- 5 Cao, W., Fang, Z., Hou, G., Han, M., Xu, X., Dong, J., Zheng, J., 2020c. The psychological impact of the COVID-19 epidemic on college students in China. *Psychiatry research* 287, 112934.
- 6 Chang, J., Yuan, Y., Wang, D., 2020. Mental health status and its influencing factors among college students during the epidemic of COVID-19. *J South Med Univ* 40, 171-176.
- 7 Chen, J., Yan, M., Yin, X., Luo, J., Chen, F., Ren, J., Gong, W., 2020b. Study on prevalence and influence factors of anxiety of medical staff in Qingbaijiang district of Chengdu during the pandemic of COVID-19 [In Chinese]. *Shandong Medical Journal* 60, 70-72.
- 8 Chen, Y., Zhou, H., Zhou, Y., Zhou, F., 2020c. Prevalence of self-reported depression and anxiety among pediatric medical staff members during the COVID-19 outbreak in Guiyang, China. *Psychiatry research* 288, 113005.
- 9 Cheng, J., Tan, X., Zhang, i., Zhu, S., Yao, H., Liu, B., 2020a. Research on the psychological status and influencing factors of novel coronavirus pneumonia patients and people under medical observation. *Journal of Nursing Administration*. Available at: <http://kns.cnki.net/kcms/detail/11.4716.C.20200303.0926.002.html>.
- 10 Cheng, L., Zheng, L., Suyu, Y., Fan, X., 2020b. Anxiety status and related factors in patients with coronavirus disease 2019. *Zhejiang Medical Journal* 42, 315-317.
- 11 Chung, J.P.Y., Yeung, W.S., 2020. Staff Mental Health Self-Assessment During the COVID-19 Outbreak. *East Asian archives of psychiatry : official journal of the Hong Kong College of Psychiatrists = Dong Ya jing shen ke xue zhi : Xianggang jing shen ke yi xue yuan qi kan* 30, 34.
- 12 Dai, Y., Hu, G., Xiong, H., Qiu, H., Yuan, X., 2020. Psychological impact of the coronavirus disease 2019 (COVID-19) outbreak on healthcare workers in China. *medRxiv*. DOI: <https://doi.org/10.1101/2020.03.03.20030874>.
- 13 Dong, R., Zhou, X., Jiao, X., Guo, B., Sun, L., Wang, Q., 2020. Psychological status in medical isolation persons during outbreak of COVID-19. *Rehabilitation Medicine* 30, 7-10.
- 14 Du, J., Dong, L., Wang, T., Yuan, C., Fu, R., Zhang, L., Liu, B., Zhang, M., Yin, Y., Qin, J., Bouey, J., Zhao, M., Li, X., 2020. Psychological symptoms among frontline healthcare workers during COVID-19 outbreak in Wuhan. *General Hospital Psychiatry*. DOI: <https://doi.org/10.1016/j.genhosppsy.2020.03.011>.
- 15 Duan, L., Guo, Y., Sun, J., Jiang, Y., Jiang, R., Su, B., 2020. Mental health status of officers and soldiers in a military hospital amid the epidemic of COVID-19. *Med J Chin PAP* 31, 191-194.
- 16 Gao, J., Zheng, P., Jia, Y., Chen, H., Mao, Y., Chen, S., Wang, Y., Fu, H., Dai, J., 2020. Mental health problems and social media exposure during COVID-19 outbreak. *PloS one* 15, e0231924.
- 17 Guo, J., Liao, L., Wang, B., Li, X., Guo, L., Tong, Z., Guan, Q., Zhou, M., Wu, Y., Zhang, J., Gu, Y., 2020. Psychological effects of COVID-19 on hospital staff: a national cross-sectional survey of China mainland. *SSRN*. DOI: <http://dx.doi.org/10.2139/ssrn.3550050>.
- 18 He, Y., Wang, Y., Wang, J., Hou, J., Wan, X., 2020. Impact of COVID-19 outbreak on sleep quality of medical staff in Wuhan. *Medical Journal of Wuhan University*. Available at: <http://kns.cnki.net/kcms/detail/42.1677.R.20200318.2130.001.html>.
- 19 Hu, W., Su, L., Qiao, J., Zhu, J., Zhou, Y., 2020. Countrywide quarantine only mildly increased anxiety level during COVID-19 outbreak in China. *medRxiv*. DOI: <https://doi.org/10.1101/2020.04.01.20041186>.
- 20 Hua, Y., Mingli, L., Zhixiong, L., Weiyi, X., Yiwen, Y., Yaya, L., Zhe, L., Zhenzhen, X., 2020. Coping style, social support and



- psychological distress in the general Chinese population in the early stages of the COVID-2019 epidemic. SSRN. DOI: <http://dx.doi.org/10.2139/ssrn.3551415>.
- 21 Huang, X., Ke, P., 2020. The effect of standardized training on the anxiety of staff in the disinfection supply center during the pandemic of COVID-19 [In Chinese]. *Chinese General Practice Nursing* 18, 548-550.
  - 22 Huang, Y., Zhao, N., 2020. Mental health burden for the public affected by the COVID-19 outbreak in China: Who will be the high-risk group? *Psychology, health & medicine* 14, 1-12.
  - 23 Ji, X., Yu, R., Mou, M., Chen, L., Chen, H., Zhou, Q., Deng, X., Yang, X., 2020. Analysis of psychological state in Sichuan area nursing undergraduate's during the epidemic of COVID-19. *Medical Education Research and Practice* 28, 225-228.
  - 24 Kazmi, S.S.H., 2020. COVID-19 and lockdown: a study on the Impact on mental health. SSRN. DOI: <http://dx.doi.org/10.2139/ssrn.3577515>.
  - 25 Kong, X., Zheng, K., Tang, M., Kong, F., Zhou, J., Diao, L., Wu, S., Jiao, P., Su, T., Dong, Y., 2020. Prevalence and Factors Associated with Depression and Anxiety of Hospitalized Patients with COVID-19. medRxiv. DOI: <https://doi.org/10.1101/2020.03.24.20043075>.
  - 26 Lai, J., Ma, S., Wang, Y., Cai, Z., Hu, J., Wei, N., Wu, J., Du, H., Chen, T., Li, R., Tan, H., Kang, L., Yao, L., Huang, M., Wang, H., Wang, G., Liu, Z., Hu, S., 2020. Factors Associated With Mental Health Outcomes Among Health Care Workers Exposed to Coronavirus Disease 2019. *JAMA network open* 3, e203976.
  - 27 Li, S., Wang, Y., Yang, Y., Lei, X., Yang, Y., 2020a. Investigation on the influencing factors for anxiety related emotional disorders of children and adolescents with home quarantine during the prevalence of coronavirus disease 2019. *Chin J Child Heal Care* 28, 407-410.
  - 28 Li, X., Dai, T., Wang, H., Shi, J., Yuan, W., Li, J., Chen, L., Zhang, T., Zhang, S., Kong, Y., Yue, N., Shi, H., He, Y., Hu, H., Liu, F., Yang, C., 2020c. Clinical analysis of suspected COVID-19 patients with anxiety and depression. *Journal of Zhejiang University (Medical Sciences)* 49, 203-208.
  - 29 Li, Y., Wang, X., Zhang, J., Du, S., Zeng, L., 2020d. Psychological survey of general population during the pandemic of COVID-19 [In Chinese]. *International Infectious Diseases* 9, 308-310.
  - 30 Liu, C., Yang, Y.-z., Zhang, X.M., Xu, X., Dou, Q.-L., Zhang, W.-W., 2020a. The prevalence and influencing factors for anxiety in medical workers fighting COVID-19 in China: a cross-sectional survey. SSRN. DOI: <http://dx.doi.org/10.2139/ssrn.3548781>.
  - 31 Liu, D., Ren, Y., Yan, F., Li, Y., Xu, X., Yu, X., Qu, W., Wang, Z., Tian, B., Yang, F., Yao, Y., Tan, Y., Jiang, R., Tan, S., 2020b. Psychological impact and predisposing factors of the coronavirus disease 2019 (COVID-19) pandemic on general public in China. SSRN. DOI: <http://dx.doi.org/10.2139/ssrn.3551415>.
  - 32 Liu, X., Liu, J., Zhong, X., 2020d. Psychological state of college students during COVID-19 epidemic. SSRN. DOI: <http://dx.doi.org/10.2139/ssrn.3552814>.
  - 33 Liu, Z., Han, B., Jiang, R., Huang, Y., Ma, C., Wen, J., Zhang, T., Wang, Y., Chen, H., Ma, Y., 2020e. Mental health status of doctors and nurses during COVID-19 epidemic in China. SSRN. DOI: <http://dx.doi.org/10.2139/ssrn.3551329>.
  - 34 Lu, W., Wang, H., Lin, Y., Li, L., 2020b. Psychological status of medical workforce during the COVID-19 pandemic: A cross-sectional study. *Psychiatry research* 288, 112936.
  - 35 Luo, Q., Yan, C., Deng, S., Zhou, L., Mai, W., Ning, Y., He, H., Zhang, S., Li, Y., Nong, F., Liao, Y., Li, A., Wu, Y., Ge, J., Zhong, Y., Hu, Y., Li, F., Peng, H., 2020. Investigation of mental health status of frontline medical staff in COVID-19 treatment hospital in Guangdong Province. *Guangdong Medical Journal*. Available at <http://kns.cnki.net/kcms/detail/44.1192.r.20200416.0840.003.html>.
  - 36 Lv, Y., Yao, H., Xi, Y., Zhang, Z., Zhang, Y., Chen, J., Li, J., Li, J., Wang, X., Hailong, L.G., 2020a. Social support protects Chinese medical staff from suffering psychological symptoms in COVID-19 defense. SSRN. DOI: <http://dx.doi.org/10.2139/ssrn.3559617>.
  - 37 Lv, Y., Zhang, Z., Zeng, W., Li, J., Wang, X., Luo, L., 2020b. Anxiety and depression survey of Chinese medical staff before and during COVID-19 defense. SSRN. DOI: <http://dx.doi.org/10.2139/ssrn.3551350>.
  - 38 Mei, j., Zhang, Q., Gong, X., Li, L., Zhang, Z., Wang, J., Chen, G., Wang, J., Xu, J., Shao, W., 2020. Analysis of Psychological and Sleep State of Medical Staff with Novel Coronavirus Pneumonia. *Herald Med* 39, 345-349.
  - 39 Moghanibashi-Mansourieh, A., 2020. Assessing the anxiety level of Iranian general population during COVID-19 outbreak. *Asian journal of psychiatry* 51, 102076.
  - 40 Mu, C., 2020. Investigation on the cognition and psychological status of COVID-19 in middle-aged ordinary residents [In

- Chinese]. *Chinese General Practice Nursing* 18, 952-955.
- 41 Naser, A.Y., Dahmash, E.Z., Al-Rousan, R., Alwafi, H., Alrawashdeh, H.M., Ghoul, I., Abidine, A., Bokhary, M.A., AL-Hadithi, H.T., Ali, D., Abuthawabeh, R., Abdelwahab, G.M., Alhartani, Y.J., Al Muhaisen, H., Dagash, A., 2020. Mental health status of the general population, healthcare professionals, and university students during 2019 coronavirus disease outbreak in Jordan: a cross-sectional study. medRxiv. DOI: <https://doi.org/10.1101/2020.04.09.20056374>.
  - 42 Qiu, J., Shen, B., Zhao, M., Wang, Z., Xie, B., Xu, Y., 2020. A nationwide survey of psychological distress among Chinese people in the COVID-19 epidemic: implications and policy recommendations. *General psychiatry* 33, e100213.
  - 43 Shi, F., Liu, Z., Zhang, Y., Wang, J., Hui, B., Wang, T., 2020. Study of the anxiety status and influencing factors of tumor patients during the epidemic of COVID-19. *J Mod Oncol* 28, 1608-1610.
  - 44 Tan, B.Y.Q., Chew, N.W.S., Lee, G.K.H., Jing, M., Goh, Y., Yeo, L.L.L., Zhang, K., Chin, H.K., Ahmad, A., Khan, F.A., Shanmugam, G.N., Chan, B.P.L., Sunny, S., Chandra, B., Ong, J.J.Y., Paliwal, P.R., Wong, L.Y.H., Sagayanathan, R., Chen, J.T., Ying Ng, A.Y., Teoh, H.L., Ho, C.S., Ho, R.C., Sharma, V.K., 2020. Psychological Impact of the COVID-19 Pandemic on Health Care Workers in Singapore. *Ann Intern Med*. DOI: <https://doi.org/10.7326/M20-1083>.
  - 45 Wang, C., Pan, R., Wan, X., Tan, Y., Xu, L., Ho, C.S., Ho, R.C., 2020a. Immediate Psychological Responses and Associated Factors during the Initial Stage of the 2019 Coronavirus Disease (COVID-19) Epidemic among the General Population in China. *International journal of environmental research and public health* 17, 1729.
  - 46 Wang, Y., Di, Y., Ye, J., Wei, W., 2020b. Study on the public psychological states and its related factors during the outbreak of coronavirus disease 2019 (COVID-19) in some regions of China. *Psychol Health Med*. DOI: <https://doi.org/10.1080/13548506.2020.1746817>.
  - 47 Wang, Y., Gao, J., Chen, H., Mao, Y., Chen, S., Dai, J., Su, P., Fu, H., 2020c. The relationship between media exposure and mental health problems during COVID-19 outbreak. *Fudan Univ J Med Sci* 47, 173-178.
  - 48 Wang, Y., Yang, Y., Li, S., Lei, X., Yang, Y., 2020d. Investigation on the status and influencing factors for depression symptom of children and adolescents with home quarantine during the prevalence of novel coronavirus pneumonia. *Chin J Child Heal Care* 28, 277-280.
  - 49 Wu, Y., Zhang, C., Liu, H., Duan, C., Li, C., Fan, J., Li, H., Chen, L., Xu, H., Li, X., Guo, Y., Wang, Y., Li, X., Li, J., Wang, Y., You, Y., Li, H., Yang, S., Tao, X., Xu, Y., Lao, H., Wen, M., Zhou, Y., Wang, J., Chen, Y., Meng, D., Zhai, J., Ye, Y., Zhong, Q., Yang, X., Zhang, D., Zhang, J., Wu, X., Chen, W., Huang, H., 2020b. Perinatal depression of women along with 2019 novel coronavirus breakout in China. SSRN. DOI: <http://dx.doi.org/10.2139/ssrn.3539359>.
  - 50 Xia, X., Wu, X., Zhou, X., Zang, Z., Pu, L., 2020. Comparison of psychological distress and demand induced by COVID-19 during the lockdown period in patients undergoing peritoneal dialysis and hemodialysis: a cross-section study in a tertiary hospital. medRxiv. DOI: <https://doi.org/10.1101/2020.04.13.20063099>.
  - 51 Xiao, C., Wang, L., Liu, J., Shen, X., Li, B., Zhang, S., Huang, G., 2020. Anxiety and depression status among non-first-line medical staff during the outbreak of COVID-19. *Sichuan Mental Health* 33, 15-18.
  - 52 Xu, Y., Zhao, M., Tang, X., Zhu, X., Chen, J., 2020. Correlation study between mental health and coping style of medical staff during COVID-19 epidemic. *Anhui Medical Journal* 41, 22-25.
  - 53 Yang, Y., Zhao, J., Qi, L., Zhang, h., 2020a. Anxiety and social support status of the spouses of first-line medical staff in Suining during the pandemic of COVID-19 [In Chinese]. *Chinese General Practice Nursing* 18, 940-944.
  - 54 Yang, Y., Zhong, L., Peng, L., 2020b. Mental health of tumor patients during the pandemic of COVID-19 [In Chinese]. *Chinese General Practice Nursing* 18, 691-693.
  - 55 Yin, X., Wang, J., Feng, J., Chen, Z., Jiang, N., Wu, J., Yan, S., Li, H., Lv, C., Lu, Z., Gong, Y., 2020. The impact of the corona virus disease 2019 outbreak on Chinese residents' mental health. SSRN. DOI: <http://dx.doi.org/10.2139/ssrn.3556680>.
  - 56 Ying, Y., Kong, F., Zhu, B., Ji, Y., Lou, Z., Ruan, L., 2020. Mental health status among family members of health care workers in Ningbo, China during the Coronavirus Disease 2019 (COVID-19) outbreak: a Cross-sectional Study. medRxiv. DOI: <https://doi.org/10.1101/2020.03.13.20033290>.
  - 57 Yuan, J., Du, Y., Xu, W., Chen, Y., 2020. Study on the anxiety and depression levels and influencing factors in patients with suspected corona virus disease 2019 in isolation. *Chongqing Medicine*. Available at: <http://kns.cnki.net/kcms/detail/50.1097.R.20200402.1619.004.html>.
  - 58 Zhang, C., Wu, J., Li, J., Guo, X., Liu, S., Zeng, Y., 2020a. Mental health of diabetic patients during the pandemic of COVID-19 [In Chinese]. *Chinese General Practice Nursing* 18, 965-968.

- 59 Zhang, C., Yang, L., Liu, S., Ma, S., Wang, Y., Cai, Z., Du, H., Li, R., Kang, L., Su, M., Zhang, J., Liu, Z., Zhang, B., 2020c. Survey of insomnia and related social psychological factors among medical staffs involved with the 2019 novel coronavirus disease outbreak. SSRN. DOI: <http://dx.doi.org/10.2139/ssrn.3542175>.
- 60 Zhang, J., Lu, H., Zeng, H., Zhang, S., Du, Q., Jiang, T., Du, B., 2020d. The differential psychological distress of populations affected by the COVID-19 pandemic. *Brain, behavior, and immunity* 87, 49-50.
- 61 Zhang, W.R., Wang, K., Yin, L., Zhao, W.F., Xue, Q., Peng, M., Min, B.Q., Tian, Q., Leng, H.X., Du, J.L., Chang, H., Yang, Y., Li, W., Shangguan, F.F., Yan, T.Y., Dong, H.Q., Han, Y., Wang, Y.P., Cosci, F., Wang, H.X., 2020e. Mental Health and Psychosocial Problems of Medical Health Workers during the COVID-19 Epidemic in China. *Psychotherapy and psychosomatics* 89, 242-250.
- 62 Zhang, X., Jia, W., Duan, L., 2020f. An investigation and analysis of psychological status of 1486 medical students in the period of COVID-19. *Journal of Inner Mongolia Medical University* Available at: <https://doi.org/10.16343/j.cnki.issn.2095-512x.20200305.001>.
- 63 Zheng, C., Shen, F., Tian, G., Zhang, L., 2020a. Psychological stress and depression of medical staff during the pandemic of COVID-19 [In Chinese]. *Zhejiang Medical Journal* 42, 406-407+410+414.
- 64 Zheng, X., Tao, G., Huang, P., He, F., Shao, X., Xu, Y., Zhong, L., Yang, G., 2020b. Self-reported depression of cancer patients under 2019 novel coronavirus pandemic. SSRN. DOI: <http://dx.doi.org/10.2139/ssrn.3555252>.
- 65 Zhou, F., Liu, X., Shao, L., Zhang, R., Wei, Y., Li, J., Wang, C., Hong, X., 2020. Perceived social support and its impact on psychological status and quality of life of medical staffs after outbreak of SARS-CoV-2 pneumonia: a cross-sectional study SSRN. DOI: <http://dx.doi.org/10.2139/ssrn.3541127>.
- 66 Zhu, Z., Xu, S., Wang, H., Liu, Z., Wu, J., Li, G., Miao, J., Zhang, C., Yang, Y., Sun, W., Zhu, S., Fan, Y., Hu, J., Liu, J., Wang, W., 2020b. COVID-19 in Wuhan: Immediate Psychological Impact on 5062 Health Workers. medRxiv. DOI: <https://doi.org/10.1101/2020.02.20.20025338>.
